1 **Difference in the impacts of the neonicotinoid**  
2 **dinotefuran administered through sugar syrup from that**  
3 **through pollen paste on a honeybee colony in the long-**  
4 **term field experiment**

5

6 **[Short title]**

7 **Difference in impact of dinotefuran on bee-colony**  
8 **between two vehicles of nectar and pollen**

9

10

11 Toshiro Yamada<sup>1</sup>, Yasuhiro Yamada<sup>2</sup>, Kazuko Yamada<sup>1</sup>

12

13 <sup>1</sup>Division of Material Science, Graduate School of Natural Science & Technology, Kanazawa  
14 University

15

16 <sup>2</sup>Department of Applied Physics, Graduate School of Engineering, University of Tokyo

17

18

19 Authors' addresses:

20 Toshiro YAMADA (corresponding author, e-mail: tyamada@staff.kanazawa-u.ac.jp), Division of  
21 Material Science, Graduate School of Natural Science & Technology, Kanazawa University,  
22 Kakuma-machi, Kanazawa 920-1192, Japan; present address as an professor emeritus of Kanazawa  
23 University: 2-10-15 Teraji, Kanazawa, Ishikawa 921-8178, Japan

24 Yasuhiro YAMADA, Department of Applied Physics, Graduate School of Engineering, University  
25 of Tokyo, 7-3-1 Hongo, Bunkyo-ku, Tokyo 113-8656, Japan

26 Kazuko YAMADA, present address: 2-10-15 Teraji, Kanazawa 921-8178, Japan;

27

28 Key words: dinotefuran; neonicotinoid; CCD; sugar syrup; pollen paste; field experiment; long-term;  
29 pesticide; honeybee; colony; systemic; failure in wintering; collapse

30

## 31 **Summary**

32 We have previously examined the impact of neonicotinoid pesticides, dinotefuran and clothianidin,  
33 on honeybee *Apis mellifera* colonies in long-term field experiments when they were simultaneously  
34 administered through both vehicles of sugar syrup and pollen paste (Yamada *et al.*, 2012). The  
35 independent effect of a pesticide through two vehicles has not been studied in our previous work. In  
36 this paper, we investigated the independent impact of dinotefuran through each of the two vehicles.  
37 We confirmed that dinotefuran intake per bee until colony extinction due to administration through  
38 pollen paste (DF-TIPP) was roughly one-fifth as much as that through sugar syrup (DF-TISS). The  
39 intake was largely independent of dinotefuran concentration. We considered the possibility of DF-  
40 TIPP per bee as an indicator to assess the impact of persistent pesticide on a honeybee colony in a  
41 practical apiary.

42 This work has replicated the finding that a honeybee colony has dwindled away to nothing after  
43 assuming an aspect of a colony collapse disorder (CCD) by administration of the neonicotinoids  
44 dinotefuran and clothianidin in our previous work, regardless of the vehicles. In addition, a failure in  
45 wintering was observed in case of administration of dinotefuran with the lowest concentration in this  
46 work even if the colony appeared vigorous before winter.

47 We can infer that a CCD and a failure in wintering may have the same roots of chronic toxicity of  
48 neonicotinoids under conditions of low concentrations due to the persistency and high toxicity which  
49 are characteristic of them.

## 52 **Introduction**

53 A rapid decline in honeybee colonies which has been first reported in Europe is becoming a serious  
54 worldwide social problem. (Cox-Foster *et al.*, 2007; Potts *et al.*, 2010; Van Engelsdorp *et al.*, 2012;  
55 Lebuhn *et al.*, 2013). A trend analysis of US agriculture demonstrated that a diminution in managed or  
56 wild pollinator populations could seriously threaten crop production (Calderone, 2012). Massive losses  
57 of honeybee colonies have begun to be actively investigated in the world when mysterious phenomenon  
58 inexplicable by physiological changes of a honeybee colony was called a colony collapse disorder (CCD)  
59 which is characterized by the rapid loss of adult bee populations from a honeybee colony with little dead  
60 bees near the hive and the state at the final stages of collapse with the presence of capped brood, a queen,  
61 a few adult bees and food stores (both honey and bee pollen). And massive losses of honeybee colonies  
62 by a failure in wintering also have threatened beekeepers and agricultural workers (Steinhauer *et al.*,  
63 2014; van der Zee *et al.*, 2014).

64 Various factors such as pesticides, mites, viruses, stresses, poor nutrition and weather patterns have  
65 been postulated as causes on a CCD and a failure in wintering (van der Sluijs *et al.*, 2013). Neumann  
66 and Carreck (2010) have reviewed fact-finding results on honeybee colony losses in the world and their  
67 causal factors. In USA, pesticides applied to crops and those, with their residues, used in apiculture in  
68 hive products were reviewed and examined to determine what could play a role in a CCD and other  
69 colony problems (Johnson *et al.*, 2010).

70 Recently, it have become predominantly convincing that a CCD and a failure in wintering are caused  
71 by a systemic pesticide itself such as a neonicotinoid and a synergy between the pesticide and others  
72 such as mites (van der Sluijs *et al.*, 2013).

73 Many studies have been reported on the impact of neonicotinoid pesticides on a honeybee colony  
74 under laboratory conditions or controlled field-experimental conditions as follows: Sublethal oral  
75 doses of imidacloprid decreased the fecundity of worker bumblebees of queenless microcolonies,  
76 showing a dose dependence that principally correlated with nutrient limitations imposed by  
77 antifeedant effects (Laycock *et al.*, 2012). Investigation of honeybee foraging behavior by the  
78 radiofrequency identification method showed that sublethal oral administration of clothianidin and  
79 imidacloprid impacted the flight frequency and duration of flight activity (Schneider *et al.*, 2012).  
80 Honeybee behavior influenced by a sublethal oral dose of imidacloprid and acaricide were effectively  
81 measured by the video-tracking method (Teeters *et al.*, 2012). Although a sublethal dose of

82 imidacloprid had no effect on capped brood, pupation, and eclosion rates of honeybee larvae, the  
83 proboscis extension reflex test after emergence revealed impairment of the development of olfactory  
84 ability (Yang *et al.*, 2012). Assessment of the effects of imidacloprid ingestion by stingless bee larvae  
85 on their survival, development, neuromorphology, and adult walking behavior revealed that these  
86 larvae were particularly susceptible to imidacloprid because the pesticide caused both high mortality  
87 and sublethal effects that impaired brain development and compromised mobility at the young adult  
88 stage (van Tomé *et al.*, 2012).

89 Pseudo-field testing revealed that the foraging activity of honeybees decreases with pesticide  
90 concentrations of a few micrograms/kilograms (imidacloprid, fipronil) (Colin *et al.*, 2004), and  
91 sublethal doses of imidacloprid are shown to affect the foraging behavior of honeybees (Yang *et al.*,  
92 2008). Furthermore, a particular vulnerability of honeybee behavior to sublethal doses of acetamiprid  
93 was suggested under laboratory conditions (El Hassani *et al.*, 2008). Under field conditions, a  
94 difference was observed in the survival rate between a group of bees treated with 70 ng imidacloprid  
95 and a control group (Visser and Blacquière, 2010). The sudden death phenomenon of bees during  
96 sowing suggests the synergistic effect of high humidity and toxicity of a powder containing  
97 neonicotinoids (Marzaro *et al.*, 2011). Colonies of bumblebees treated with field-realistic levels of  
98 imidacloprid showed a significantly reduced growth rate and a production rate of new queens about  
99 15% that of the control colonies (Whitehorn *et al.*, 2012). Sublethal exposure of honeybees to  
100 thiamethoxam at levels that could put a colony at risk of collapse caused high mortality due to homing  
101 failure (Henry *et al.*, 2012), and Matsumoto (2013) demonstrated that neonicotinoid and pyrethroid  
102 exposure reduced successful homing flights at doses far below the median lethal dose (LD<sub>50</sub>) in the field  
103 where neonicotinoid caused the reduction at relatively lower exposure than pyrethroid. Chronic  
104 exposure of bumblebees to imidacloprid at approximate field-level concentrations reduced the  
105 amount of pollen collected because of impaired foraging efficiency and (Gill *et al.*, 2012).

106 Only a few studies have been reported on the impact of neonicotinoid pesticides on a honeybee  
107 colony under long-term field conditions (Lu *et al.*, 2012; 2014; Yamada *et al.* 2012). Yamada *et al.*  
108 (2012) have tried to verify the possibility of neonicotinoids, clothianidin and dinotefuran, causing a  
109 CCD based on experiments in 2010 in which a CCD was reproduced by field testing. The experiments  
110 were carried out at three concentrations (low, middle, high) for each of clothianidin and dinotefuran  
111 and similar results were obtained for clothianidin and dinotefuran. At low and middle concentrations  
112 each pesticide was continuously administered through both vehicles (foods) of sugar syrup and pollen  
113 paste till the colony extinction. At high concentration it was not administered till the colony extinction  
114 after it was administered through both vehicles only for the first time around. At high concentration  
115 massive dead bees were found near the hive of each high concentration colony just after the first  
116 administration of each pesticide; thereafter, a few dead bees were found similarly to control colonies  
117 and experimental colonies at low and high concentration of pesticide. A queen existed in the hive  
118 together with some adult bees just before the colony extinction. Each number of adults, capped brood  
119 and dead bees in the colony where dinotefuran was administered similarly changed with day to that  
120 of clothianidin while assuming an aspect of a CCD. In addition, they have made it clear from the  
121 speculations with the NMR spectral analysis that dinotefuran is thermally and radiationally stable  
122 under the conditions of 50 °C×24hrs or 310nm×50 W/m<sup>2</sup>. It has been suggested that neonicotinoids  
123 are very persistent and continue to accumulate in organisms. Around the same time frame as our  
124 previous paper, Lu *et al.* (2012) have reported that the neonicotinoid imidacloprid can cause a failure  
125 in wintering on honeybee colonies through field experiments in several apiaries and have recently  
126 confirmed their previous results by a long-term field experiments with imidacloprid and clothianidin  
127 (Lu *et al.*, 2014).

128 Yamada *et al.* (2012) have inferred that the bottom cause of the inexplicable collapse of honeybee  
129 colonies is probably neonicotinoid pesticides which are persistent, systemic and highly toxic for the  
130 reasons why the characteristics of a neonicotinoid pesticide lead to the disorientation of honeybees,  
131 the reduction in ovipositional performance of a queen and the infestation of mites and viruses due to  
132 the weakening of honeybees when exposed to honeybees in its low concentrations for a long period

133 of time, or their instant death when exposed to them in its high concentrations. One of convincing  
134 causal factors is probably neonicotinoid pesticides themselves or factors compounded of  
135 neonicotinoid pesticides and others such as mites (Alaux *et al.*, 2010; Pettis *et al.*, 2012). That is,  
136 neonicotinoid pesticides seem to play a vital part in massive losses of honeybee colonies. An  
137 extensive survey of honeybee colony losses was conducted in Japan in 2008–2010, which revealed  
138 that bee loss was mostly due to neonicotinoids sprayed for stink bug control following rice flowering  
139 (Taniguchi *et al.*, 2012).

140 In previous studies a pesticide was administered to a honeybee colony through sugar syrup or its  
141 analogues containing a given amount of pesticide (Colin *et al.*, 2004; Laurino *et al.*, 2011; Henry *et al.*  
142 *et al.*, 2012; Schneider *et al.*, 2012; Lu *et al.*, 2012, 2014; Teeters *et al.*, 2012), or was simultaneously  
143 administered through both sugar syrup and pollen paste (Yamada *et al.*, 2012). The previous studies  
144 have paid never attention to the intake route of a pesticide by honeybees though there can be a  
145 difference in the influence of a pesticide on a honeybee colony between different intake routes of  
146 sugar syrup and pollen paste.

147 It is known that brood and a queen preferentially take pollen which is an important protein source  
148 for honeybees rather than honey which is an important energy source for them though all members  
149 of a honeybee colony take both. Therefore, toxic honey with neonicotinoid pesticides may affect a  
150 honeybee colony differently from toxic pollen. We cannot find papers on the influence of the route,  
151 through which honeybees takes a pesticide, on a honeybee colony.

152 In this work we therefore clarify the influence of dinotefuran, which is the most commonly used  
153 neonicotinoid in Japan, on honeybee colonies depending on a kind of the administration vehicle  
154 (sugar syrup or pollen paste) under the field experiments performed from July 9<sup>th</sup> in 2011 to April 2<sup>nd</sup>  
155 in 2012. Experimental concentrations of dinotefuran were determined with reference to clothianidin  
156 content of 5 ppm in water detected near a paddy field where the pesticide was crop-dusted (Kakuta  
157 *et al.*, 2011), similarly to the previous work (Yamada *et al.*, 2012). The neonicotinoid dinotefuran was  
158 administered through either sugar syrup or pollen paste in a hive at two concentrations each, on the  
159 assumption that sugar syrup corresponds to nectar or honey and water and pollen paste does to bee  
160 bread in the natural environment. By the way, in the natural environment we must pay attention to  
161 the possibility that we cannot always make a clear-cut distinction between the influence of a pesticide  
162 through honey (nectar) and that through bee bread because bee bread is made by mixing pollen with  
163 water and nectar from the bee's mouth, which causes the pollen granules to grow. Even if pollen is  
164 not contaminated by a pesticide, the bee bread may be contaminated by it through toxic nectar or  
165 water in the natural environment. We can use the results in this work with due consideration for the  
166 above possibility in the natural environment.

167 In addition to the comparison between two intake routes of the pesticide, we confirm in this study  
168 the fact that a honeybee colony have become extinct to nothing after assuming an aspect of a CCD in  
169 the previous experiments (Yamada *et al.*, 2012) and we discuss the possibility for an indicator to  
170 assess a collapse of a honeybee colony due to persistent pesticides such as neonicotinoids instead of  
171 LD<sub>50</sub> which is related to the death of an individual honeybee.

172  
173

## 174 **Materials and Methods**

### 175 **Ethics statement**

176 We clearly state that no specific permissions were required for these locations/activities because  
177 the apiary at which we performed the experiments for this study belongs to the author (Toshiro  
178 Yamada). We confirm that the field studies did not involve endangered or protected species.

179

### 180 **Materials and preparation of pesticide concentrations**

181 The pathways where honeybees take pesticides from nectar, pollen, water and so on into a colony  
182 are very complicated. For examples, nectar and pollen contaminated with pesticides are imported  
183 from fields into a hive, most of which are stored on combs as honey or bee bread after the pesticides

184 are diluted with pesticide-free one and have an enduring effect on a honeybee-colony. Toxic water is  
185 fed to young bees and brood in the early spring or is used to reduce the temperature of cells in summer  
186 and result in contamination of the whole hive with pesticides. Field experiments include many  
187 uncontrollable factors contrary to laboratory ones. In order to decrease in ambiguity as much as  
188 possible we try to avoid unintentional contamination with pesticides. First we selected an  
189 experimental apiary site where there were no large paddy fields and orchards in the vicinity where  
190 aerial-spraying supposed to be conducted, whose pesticide-concentration is about 100 times as high  
191 as hand-spraying, (for example, the concentration of dinotefuran is 12500 ppm in aerial-spray solution  
192 in Japan and 1000 ppm in hand-spray one for extermination of stinkbugs). Secondly, we located a  
193 honeybee-watering place in the experimental apiary where leaf mustard *Brassica juncea* and hairy  
194 vetch *Vicia villosa* were planted to supply experimental honeybee colonies with pesticide-free water  
195 nectar and pollen and to minimize the effects of environmental factors.

196 Experiments were performed in 2011 under experimental conditions as tabulated in **Table 1**.  
197 STARKLE MATE<sup>®</sup> (10% dinotefuran; Mitsui Chemicals Aglo, Inc., Tokyo, Japan) which is a  
198 commercial product and mostly sprayed on rice paddies in Japan was used in this study instead of  
199 dinotefuran only in order to bring the experimental conditions closer to the realistic field ones.  
200 STARKLE MATE<sup>®</sup> includes auxiliary materials such as stabilizers, surfactants and adjuvants which  
201 are assumed to be biologically inert. Though the auxiliary materials may slightly affect honeybee  
202 colonies (Ciarlo *et al.*, 2012), we have expressed the experimental concentration of the active  
203 ingredient of the pesticide by the concentration of dinotefuran only in this study.

204 Based on a concentration of 5 ppm clothianidin detected near a paddy field in which the pesticide  
205 was crop-dusted (Kakuta *et al.*, 2011) and maximum residue limits (MRLs) of agricultural chemicals  
206 in foods in Japan (JFCRF, 2013) where MRLs of dinotefuran range from 0.1 ppm to 25 ppm, those  
207 of clothianidin from 0.02 ppm to 50 ppm and those of imidacloprid from 0.05 ppm to 10 ppm, the  
208 highest concentration of dinotefuran administered to a colony was determined to be 10 ppm, because  
209 the insecticidal activity of dinotefuran for stink bugs is about 0.4 times that of clothianidin from our  
210 previous work (Yamada *et al.*, 2012) and five ppm of clothianidin is equivalent to 12.5 ppm of  
211 dinotefuran. The concentrations of dinotefuran used were 1 and 10 ppm (termed Low and High,  
212 respectively) in sugar syrup and 0.565 and 5.65 ppm (termed Low and High, respectively) in pollen  
213 paste, because pollen paste comprises pure pollen without pesticide and sugar syrup with dinotefuran  
214 in the ratio 1:1.3. We can now define DF-Low/Syrup, DF-Low/Pollen, DF-High/Syrup, and DF-  
215 High/Pollen as sugar syrup with 1 ppm dinotefuran, pollen paste with 0.565 ppm dinotefuran, sugar  
216 syrup with 10 ppm dinotefuran, and pollen paste with 5.65 ppm dinotefuran, respectively. Dinotefuran  
217 is denoted by DF, and 10 ppm dinotefuran is equivalent to 10% of the recommended concentration  
218 (100 ppm) for exterminating stink bugs.

219

## 220 **Methods used in field experiments**

221 In order to enhance the accuracy of experiment, it can be considered to increase the number of  
222 experimental colonies from the statistical point of view and to improve the accuracy of measurement  
223 in each experiment. In this study, we have tried to improve the accuracy of measurement as follows:

224 The numbers of honeybees and capped brood in a hive are often estimated from the weight of a  
225 hive and the area ratio on each comb occupied by sealed cells, respectively. These are a simple and  
226 easy method which can roughly grasp the change of the number of each member in a honeybee colony  
227 but may lack accuracy. For example, in the estimation of honeybee number by the weight method the  
228 weight of an individual honeybee is incomparably lighter than the whole weight of a hive and the  
229 instrumental errors in measurement can be equivalent to the weight of a few hundred honeybees. And  
230 it is hard to differentiate the weight of honeybees from that of the others such as honey, bee-bread,  
231 comb, propolis etc in a hive which change with time. The estimation of the number of capped brood  
232 by the area method may include the difficulty when the area is occupied heterogeneously by dotted  
233 capped brood and the others. We have tried to accurately count honeybees and capped brood one by  
234 one on the photos of combs and the inside of a hive. Though we have tried to develop a new automatic

235 counting software system with the operation of binarizing photo images of combs and the inside of a  
236 hive, we cannot succeed in accurate counting of them because exposure conditions to take photos are  
237 unstable in the field. The system cannot always accurately count overlaid bees, ones on a blurred  
238 image, ones on a low or an uneven contrast image and/or ones on a low brightness image, and capped  
239 brood differentiating from sealed honey in sealed cells even when the threshold is changed. Therefore,  
240 we have tried to count honeybees and capped brood directly and patiently one by one with a hand-  
241 operated counter judging visually to aim for accuracy.

242 Five hives, in each of which three combs numbered and ordered numerically and a feeder were  
243 installed, were sited on a hill facing east and being aligned north–south. The total number of adult  
244 bees on all combs and a feeder and the inside of a hive box (4 walls and the bottom) was counted  
245 directly from photographs (sometimes enlarged) of them with a counter. The total number of capped  
246 brood was counted in a similar manner, after shaking the bees off each comb. The total number of  
247 dead bees in and around a hive were counted, which was placed on a large tray, one by one with a  
248 pair of tweezers. Consumption of foods (sugar syrup and pollen paste) by the honeybees was  
249 accurately measured with a weighing instrument after removing dead bees. A queen in a hive was  
250 photographically recorded on each observation date, as were specific situations such as the presence  
251 of chalk brood or wax moth larvae and Asian giant hornet attacks. During the experimental period,  
252 the state of a hive was recorded with a digital camera at intervals of 1 h.

253 Experiments started in July, after the swarming season, and were performed early in the morning  
254 on fine or cloudy days, before the foraging bees left a hive. They were performed in an apiary where  
255 honeybees could freely visit flowers in the field, thus allowing to avoid consumption of the food  
256 provided (sugar syrup and pollen paste containing a pesticide) in the case that the pesticide was  
257 repellent to honeybees. Both new foods (sugar syrup and pollen paste), which were prepared  
258 according to experimental conditions, were fed to a hive after weighing old ones which were removed  
259 from the hive every observation date. In DF-Low/Syrup and DF-Low/Pollen, the pesticide  
260 (dinotefuran) continued to be administered into a colony till extinction and just before wintering,  
261 respectively. On the other hand, in DF-High/Syrup and DF-High/Pollen, the pesticide was  
262 administered only for the first time around (for the first 7 days). The surviving colonies escaped from  
263 a collapse appeared vigorous before wintering. Experiments were recorded by still and moving  
264 photography, and the results could be accessed at any time, if necessary.

265  
266

## 267 **Results**

### 268 **Long-term observations**

269 **Table 2** shows our observational results in this work. General information from these observations  
270 can give an overview of changes in experimental situations and conditions, such as the numbers of  
271 combs added later as occasion arises, the incidences of chalk brood, or wax moth mites, and attacks  
272 by Asian giant hornets and the number of dead bees.

273 It has been revealed that high-concentration pesticides caused almost instant deaths of many bees  
274 and that few mites were present in every hive during the experimental period even after very few  
275 adults remained. Almost no wax moth larvae were present except in DF-Low/Syrup where they began  
276 to appear about three weeks before the extinction and greatly increased just before the extinction.  
277 Each queen continued to survive to extinction of the colony except for the case of DF-High/Pollen.

### 278 **Measurement of number of adult bees, capped brood, and dead bees**

280 **Table 3** shows the numbers of adult bees, capped brood, and dead bees in this work.

281 **Figures 1-3** show changes in the number of adult bees, capped brood and dead bees, respectively.  
282 Administration of the pesticide led to the decreases in adult bees and capped brood as shown in  
283 **Figures 1** and **2**. Experimental colonies of DF-Low/Syrup, DF-Low/Pollen, and DF-High/Syrup  
284 dwindled away to nothing through the aspects of a CCD (the existence of a queen with some bees  
285 and capped brood, stock of foods, few dead bees around a hive) except for DF-High/Pollen. Such

286 aspects of a CCD has been already assumed similarly in our previous work (Yamada *et al.*, 2012)  
287 conducted in 2010. A photographic image of a CCD is shown in **Figure 4**. On the other hand, in DF-  
288 High/Pollen a queen was dead before the second administration of the pesticide.

289 **Table 3** and **Figures 1-3** suggest the followings under the support of the records with digital  
290 cameras in front of hives at intervals of 1 h:

291 In DF-Low/Syrup where sugar syrup containing 1 ppm of dinotefuran continued to be fed to a  
292 colony till extinction, adult bees and capped brood gradually decreased in number under the existence  
293 of a queen and far fewer dead bees than the decrease of adult bees and finally the colony become  
294 extinct. In DF-Low/Pollen where pollen paste containing 0.565 ppm of dinotefuran continued to be  
295 fed to a colony till the morning of November 26<sup>th</sup>, 2011 (just before wintering) and after dinotefuran-  
296 free one was fed till extinction, adult bees and capped brood did not much change in number till the  
297 start of wintering under the existence of a queen and as few dead bees as the ordinary level and they  
298 became zero during wintering. In DF-Low/Syrup and DF-Low/Pollen, a queen survived to colony  
299 extinction, with a gradual decrease in the numbers of adult bees and capped brood, and the presence  
300 of as few dead bees as the ordinary level giving the appearance of a CCD prior to extinction.

301 In DF-High/Syrup where sugar syrup containing 10 ppm of dinotefuran was fed to a colony for  
302 first seven days (only once) and after that pesticide-free one continued to be fed, adult bees and capped  
303 brood sharply decreased in number with many dead bees just after administration of the pesticide and  
304 they gradually decreased in number under the existence of a queen and few dead bees and finally they  
305 become zero. In DF-High/Pollen, pollen paste containing 5.65 ppm of dinotefuran was fed to a colony  
306 for first seven days (only once) with a queen being dead in the meantime, and after that pesticide-free  
307 one continued to be fed. Adult bees and capped brood sharply decreased in number with many dead  
308 bees without a queen and they decreased in number with some dead bees and finally the colony  
309 become extinct.

310 In DF-High/Syrup and DF-High/Pollen, mass dead bees were found in front of a hive on the day  
311 after administration of the pesticide as described in **Table 2**. In DF-High/Syrup, a queen survived to  
312 colony extinction, with sharp decreases in the numbers of adult bees and capped brood just after the  
313 administration of dinotefuran, followed by their gradual decreases with the colony giving the  
314 appearance of a CCD where a queen, brood and a small number of workers exist with few dead bees  
315 near a hive and some bee-foods (honey, bee-bread). On the other hand, in DF-High/Pollen, a queen  
316 was lost immediately after the administration of dinotefuran, and there were many dead bees present.  
317 This was followed by a sharp decrease in the number of adult bees and capped brood and the colony  
318 rapidly become extinct. These results suggest that when a pesticide such as dinotefuran is  
319 administered through pollen paste, it may impact a queen more strongly than when it is administered  
320 through sugar syrup.

321 **Figure 3** indicates that the number of dead bees remained almost constant at a low level, except  
322 for the periods immediately after the administration of high-concentration dinotefuran and when  
323 attack by Asian giant hornets was recorded.

324 Colonies of DF-Low/Syrup, DF-High/Syrup and DF-High/Pollen had already collapsed before  
325 wintering. Although the surviving DF-Low/Pollen colony appeared active just before wintering on  
326 December 3, whose number of adult bees on that date was greater than that at the start of the  
327 experiment on July 9, the colony was confirmed to be unsuccessful in wintering by mid-February the  
328 following year, as shown in **Figure 5**. This seems to be because the administration of the pesticide  
329 through pollen mainly affects brood and newborn bees before winter and makes the longevity of adult  
330 bees which have eclosed from the brood in DF-Low/Pollen shorter than that in Control. The control  
331 colony succeeded in wintering and was vigorous after the end of experiment (April 2<sup>nd</sup>, 2012).

### 332 333 **Intake of pesticide in colonies**

334 **Table 4** shows the change in the consumption of foods (sugar syrup, pollen paste) and the change  
335 in the intake of dinotefuran (pesticide) taken from foods in this work. **Figure 6** shows the change in  
336 the intake of dinotefuran for experimental colonies.

337 **Table 4** and **Figure 6** indicate that high-concentration pesticide was mostly taken by honeybees for  
338 a short time after the start of the experiment but that low-concentration pesticide was taken over a  
339 longer period before colony extinction. The total intake of pesticide in a colony can involve honey or  
340 bee bread stored in combs as noxious provisions

341

#### 342 **Grand total number of honeybees having taken pesticide in an experimental colony**

343 Here, we consider two cases on a period when honeybees were exposed to a pesticide in an  
344 experimental colony: CASE 1 is the shortest period case where the pesticide was immediately  
345 ingested by honeybees soon after administered and the period is equal to the administration one;  
346 CASE 2 is the longest one where the pesticide was partly stored in cells and continued to be ingested  
347 by honeybees till the colony extinction. In a control colony the period to obtain the grand total number  
348 is the feeding period of sugar syrup or pollen paste.

349 The grand total number of honeybees having taken a pesticide in an experimental colony is defined  
350 by the sum of the numbers of pre-existing (initial) adult bees and newborn ones for the duration of  
351 pesticide administration (CASE 1) or till extinction (CASE 2).

352 The following assumptions were made: (1) The age distribution of capped brood at an observation  
353 date is uniform between the first day when the cells of larvae are newly capped and the twelfth day  
354 when they eclose. (2) The number of adult bees that emerge from the pupae (capped brood) per day  
355 at a given day is one-twelfth of that of the capped brood at the last observation date before the day.  
356 (3) The total number of adult bees born between two successive observation dates is given by the  
357 product of one-twelfth of the number of capped brood at the former observation date and the number  
358 of days from the former to the latter observation date (4) The procedure in (3) is applied even when  
359 the number of days between two successive observation dates is greater than 12. (5) The number of  
360 capped brood at the time of the final pesticide administration or colony extinction is regarded as the  
361 number of adult bees having ingested the pesticide assuming that all the capped brood has already  
362 ingested the pesticide. (6) There is no newly capped brood after the middle of December because a  
363 queen stops laying eggs at the beginning of December in Japan

364 Now, we give an example of the procedure for estimating the grand total number of honeybees  
365 from **Table 3** for the DF-Low/Pollen colony from July 9<sup>th</sup> in 2011 to December 3<sup>rd</sup> when the pesticide  
366 administration into the colony was stopped (CASE 1) under the above-mentioned assumptions. The  
367 number of initial adult bees is 2158; the total number of adult bees newborn between each two  
368 successive observation dates =  $(2556/12)(7-0) + (2377/12)(13-7) + (3207/12)(20-13) + (2743/12)(28-$   
369  $20) + (3480/12)(34-28) + (3217/12)(40-34) + (1933/12)(48-40) + (2099/12)(63-48) + (1343/12)(70-$   
370  $63) + (1546/12)(77-70) + (2693/12)(82-77) + (2445/12)(90-82) + (2082/12)(104-90) +$   
371  $(1935/12)(113-104) + (2105/12)(118-113) + (2665/12)(132-118) + (1720/12)(140-132) +$   
372  $(1034/12)(148-140) = 27781$ ; and the number of brood at the stop of the pesticide administration  
373 (December 3<sup>rd</sup>) is 840. That is, the grand total number of honeybees for the DF-Low/Pollen colony  
374 in CASE 1 till the stop of the pesticide (dinotefuran) administration on December 3<sup>rd</sup> (during 148  
375 days elapsed) is the sum (30779) of the initial bees (2158), the newborn ones (27781) and the final  
376 brood (840). Similarly, the grand total number of honeybees for the DF-Low/Pollen colony in CASE  
377 2 is the sum (31076) of the initial bees (2158), the newborn ones (28918) obtained from the equation  
378 that  $27781 + (840/12)(162-148) + 157$  and the final brood (0).

379 CASE 1 is based on the assumption that the pesticide administered leads to the colony extinction  
380 while affecting honeybees (adult bees, brood etc.) only during the administration period of pesticide.  
381 CASE 2 is based on the assumption that it continues to affect all of honeybees in the colony till  
382 extinction even if it is discontinued halfway to be administered.

383

#### 384 **Total intake of pesticide per bee**

385 The total intake of pesticide per bee is defined by the division of the total intake of pesticide in a  
386 colony by the grand total number of honeybees having taken pesticide in the colony, which may be  
387 able to become an indicator to assess the collapse of a honeybee colony. Now, we give an example of



388 the procedure for estimating the total intake of pesticide per bee for the DF-Low/Pollen colony in  
389 CASE 1: The total intake of the pesticide through pollen paste in a colony (DF-TIPP) is 1.8692 mg  
390 and the grand total number of honeybees (GTNH) is 30779 heads. Therefore, the total intake of  
391 pesticide per bee through pollen paste (DF-TIPP per bee) is  $1.8692 \times 10^6 / 30779 = 60.73$  ng/bee for  
392 CASE 1 of DF-Low/Pollen. Similarly, DF-TIPP per bee is  $1.8692 \times 10^6 / 31076 = 60.15$  ng/bee for  
393 CASE 2.

394 **Table 5** shows the total intake of pesticide (dinotefuran) through sugar syrup in a colony (DF-TISS)  
395 or that through pollen paste (DF-TIPP) and the grand total number of honeybees in a colony (GTNH)  
396 obtained according to the procedure mentioned above, the total intakes of dinotefuran taken by  
397 individual bees during a period of the pesticide administration (CASE 1) or till extinction (CASE 2)  
398 through either sugar syrup or pollen paste in this work, and those taken through both sugar syrup  
399 and pollen paste in our previous work (Yamada *et al.*, 2012) for reference.

400 The estimated GTNH in CASE 2 becomes more than that in CASE 1 because the pesticide is  
401 assumed to affect the colony for a longer period in CASE 2 including a pesticide-free period than in  
402 CASE 1 excluding the period. Consequently, the total intake of the pesticide (dinotefuran) per bee  
403 can be estimated lower in CASE 2 than in CASE 1 because the total intake of the pesticide for the  
404 duration of the experiment period in CASE 1 is same as that in CASE 2.

405 In both CASE 1 and CASE 2, the total intakes of dinotefuran per bee through sugar syrup (DF-  
406 TISS per bee) are roughly 300 ng/bee (DF-Low/Syrup, DF-High/Syrup) and those through pollen  
407 paste (DF-TIPP per bee) are about 60 ng/bee (DF-Low/Pollen, DF-High/Pollen) except for CASE 2  
408 of DF-High/Syrup in this work.

409 In CASE 2 of DF-High/Syrup where the colony continued to survive for a long pesticide-free  
410 period before wintering after a short pesticide administration period, consequently the total intake  
411 per bee is about 140 ng/bee which is far below 300 ng/bee.

412 It can be seen from the results in CASE 1 of **Table 5** in this work that DF-TISS per bee is 5.116  
413 times ( $310.7/60.73$ ) at low concentrations and 4.461 times ( $290.3/65.08$ ) at high concentrations as  
414 much as DF-TIPP per bee, respectively. We can confirm that the intake of dinotefuran through pollen  
415 paste leading to the collapse of honeybee colony seems to be roughly one-fifth as much as that through  
416 sugar syrup in the case of CASE 1. Incidentally, the reason why DF-TIPP per bee in DF-High/Pollen  
417 ( $65.08$  ng/bee) is slightly greater than that in DF-Low/Pollen ( $60.73$  ng/bee) may be that the initial  
418 number of capped brood in DF-High/Pollen (6093) is more than double that in DF-Low/Pollen (2556)  
419 because brood take pollen paste (bee bread) in preference to sugar syrup (honey).

420 In our previous work conducted in 2010 (Yamada *et al.* 2012) where both sugar syrup and pollen  
421 paste with the pesticide were simultaneously administered to an experimental colony, the number of  
422 capped brood was given by the area ratio of the comb surfaces occupied with capped brood. We  
423 converted that into the number of capped brood from the average number (3249) of cells on every  
424 comb surface of all colonies. The average number was obtained as follows: The number of cells on  
425 each surface of every comb for all colonies was counted from photos without bees, which ranged  
426 from 3024 to 3432 and the mean value of each colony ranged from 3180 to 3318.

427 **Figure 7** shows the total intakes of dinotefuran per bee for CASE 1 in this work and those in our  
428 previous work after converting DF-TIPP per bee into DF-TISS per bee with a 5.116-fold  
429 magnification at low concentrations, a 4.461-fold one at high concentrations and a 4.789-fold one at  
430 middle concentrations which is an average at low and high concentrations, respectively.

431 DF-TISS per bee in this work is in broad agreement with that after converting DF-TIPP per bee  
432 into DF-TISS per bee in previous work (Yamada *et al.* 2012). It is strange that DF-TISS per bee (ca.  
433 300 ng/bee) is much more than LD<sub>50</sub> ranging from 8 ng/bee to 61 ng/bee (US-EPA, 2004).  
434 Incidentally, the total intake through pollen paste (ca. 60 ng/bee) is on a comparable level with LD<sub>50</sub>.

435

#### 436 **Total intake of each food per bee**

437 Here, we turn our eyes to the total intake of each food (sugar syrup, pollen paste). The total intake  
438 of sugar syrup in a colony (TISS) or pollen paste in a colony (TIPP) in CASE 1 and that in CASE 2

439 are tabulated in **Table 5**. The total intake of each food per bee is obtained from dividing the TISS or  
440 TIPP by GTNH. TISS per bee and TIPP per bee for CASE 1 and CASE 2 in DF-Low/Syrup and DF-  
441 Low/Pollen-in this work and those in DF-Low in our previous work are almost equal to or more than  
442 those in each Control, respectively; that is, 0.311-0.59g/bee of sugar syrup, 0.108- 0.111g/bee of  
443 pollen paste in DF-Low/Syrup, and 0.367 g/bee of sugar syrup and 0.058 g/bee of pollen paste in  
444 Control in this work; then, 0.333 g/bee of sugar syrup and 0.049 g/bee of pollen paste in DF-Low,  
445 and 0.182-0.205 g/bee of sugar syrup and 0.029-0.032 g/bee of pollen paste in Controls in our  
446 previous work.

447 On the other hand, those in CASE 1 in DF-High/Syrup and DF-High/Pollen in this work and those  
448 in DF-Middle and DF-High in our previous work are much less than those in each Control; that is,  
449 0.011-0.029 g/bee of sugar syrup, 0.012-0.025g/bee of pollen paste in DF-High/Syrup and  
450 High/Pollen in this work; then, 0.020-0.147 g/bee of sugar syrup and 0.005 -0.024 g/bee of pollen  
451 paste to in DF-Middle and DF-High in our previous work.

452 In CASE 2 at high concentrations of dinotefuran, the total intakes of sugar syrup per bee in DF-  
453 High/Syrup (0.272 g/bee) and DF-High/Pollen (0.132 g/bee) in this work and that in DF-High (0.137  
454 g/bee) in our previous work are much more than those in CASE 1, respectively; and then, those of  
455 pollen paste per bee in DF-High/Syrup (0.109 g/bee) and DF-High/Pollen (0.027 g/bee) in this work  
456 and that in DF-High (0.029 g/bee) in our previous work are much more than those in CASE 1,  
457 respectively. The reason for these increases is because the appetite of honeybees which have escaped  
458 death due to the administration of the pesticide (dinotefuran) came back during the feeding of  
459 pesticide-free foods. Though the improvement of their appetite during a pesticide-free period appears  
460 to be a proof of repellency at high concentrations, dinotefuran may only diminish their appetite rather  
461 than works repellently judging from enough intake of dinotefuran to lead to the colony extinction as  
462 compared with LD<sub>50</sub>.

463  
464

## 465 Discussion

466

### 467 Effect of dinotefuran (neonicotinoid pesticide) on adult bees and brood

468 We will now discuss the effect of dinotefuran (neonocotinoid pesticide) on the number of adult  
469 bees and capped brood on the basis of experimental results from 2011, as shown in **Tables 2 and 3**  
470 and **Figures 1 to 3**, proposing our plausible suppositions on the causal process where a honeybee  
471 colony leads to extinction.

472 High concentrations of dinotefuran, such as those in DF-High/Syrup and DF-High/Pollen, resulted  
473 in the presence of many dead bees near a hive and in the feeder within a few hours of administration.  
474 Considering that the concentration of pesticides sprayed on fields is about 10-fold higher than that in  
475 this work of the 2011 experiment, colonies can be presumed to collapse as follows: Foraging bees are  
476 instantly killed near the region where a high concentration of pesticide is sprayed because they take  
477 water, nectar, or pollen containing pesticide or contact with the pesticide. Instant death of foraging  
478 bees brings about a change in bee role, with house bees becoming foraging bees, thus resulting in the  
479 lack of house bees, and consequentially, in the collapse of the colony. The number of adult bees  
480 decreases markedly immediately after the temporary and brief administration of a high-concentration  
481 pesticide. Even after discontinuation of administration, their number continue to decrease, leaving a  
482 queen, small numbers of adult bees and brood and some amount of provisions with a very small  
483 number of dead bees in and around the hive. The reason why the number of adult bees decreased  
484 despite small number of dead bees is probably that foraging bees cannot return to the hive because of  
485 the nervous disorders or debility due to the toxicity of the pesticide ingested during their brood stage.

486 A queen did not die at a high concentration of the pesticide through sugar syrup (DF-High/Syrup)  
487 and died through pollen paste (DF-High/Pollen). The reason for this is broadly as follows: A queen is  
488 more susceptible to the pesticide through pollen paste than through sugar syrup because it can mainly  
489 take pollen. Even if a queen does not die by taking pesticides, it would lay only few eggs due to her

490 reduced egg-laying capacity. Short time administration of pesticides with high concentrations leads  
491 to the instant death of many honeybees with acute toxic symptoms and even the subsequent pesticide-  
492 free administration finally leads to the colony extinction after presenting an appearance of a CCD  
493 because of the imbalanced colony structure, the reduced egg-laying performance of a queen and so  
494 on. Incidentally, it may be undeniable that toxic foods stored in a hive during pesticide administration  
495 continue to adversely affect honeybees even after the discontinuance of pesticide administration.

496 Continuous administration of a low-concentration pesticide (about 1% of the concentration  
497 recommended to exterminate stink bugs) caused colony extinction via an aspect of a CCD (DF-  
498 Low/Syrup) and a failure in wintering (DF-Low/Pollen). We found the following difference between  
499 the two vehicles: Colony collapse occurs earlier through sugar syrup than through pollen paste. This  
500 difference appears to be due to the total pesticide intakes which are 4.208 mg of dinotefuran in DF-  
501 Low/Syrup and 1.8692 mg in DF-Low/Pollen. The reason why a colony took less pesticide during a  
502 longer period through pollen paste than through sugar syrup is as follows: The intake period of pollen  
503 paste mainly taken by brood, whose developmental stage is shorter than that of adult bees, is shorter  
504 than the intake period of sugar syrup which is mainly consumed by adult bees. Add to this, the  
505 concentration of dinotefuran in pollen paste (0.565 ppm) is lower than that in sugar syrup (1 ppm).  
506 The reason why the colony failed in wintering in DF-Low/Pollen despite feeding pesticide-free foods  
507 before winter are probably because (1) the longevity of honeybees in DF-Low/Pollen could not  
508 increase due to the pesticide taken till then so much as that in Control could do with winter  
509 approaching and/or (2) honeybees continued to take toxic food stored in a hive.

510

#### 511 **Comparison of the effect in toxicity of dinotefuran between this work and previous one**

512 We now will consider the case where the insecticidal activity of dinotefuran through pollen paste  
513 is assumed to be higher than (about five times) that through sugar syrup. **Figure 7** shows DF-TISS  
514 per bee for CASE 1 or DF-TIPP per bee in this work, and the sum of both the intake of dinotefuran  
515 through sugar syrup and that through pollen paste converted into that through sugar syrup in our  
516 previous work (Yamada *et al.*, 2012), where both sugar syrup and pollen paste containing dinotefuran  
517 were administered into each experimental colony. When comparing the intakes through sugar syrup  
518 in this work with converted ones in our previous work, it can be seen from **Figure 7** that they are on  
519 a comparable level with each other though the intakes in our previous work are somewhat higher than  
520 those in this work. These small differences may come from a state of colony such as the colony  
521 conditions and the environmental ones such as weather ones and seasonal ones, etc. We will consider  
522 whether the intake of food (sugar syrup, pollen paste) ingested by honeybees depends on the weather  
523 or not. As most of the total intake of dinotefuran is taken in a short period after the start of experiment  
524 as shown in **Figure 6**, it is enough to compare the weather during only a few weeks from the start of  
525 experiment between previous work and this one. **Figure 8** shows the comparison between the weather  
526 during two weeks from the start of experiment in 2010 of our previous work (Yamada *et al.*, 2012)  
527 and that in 2011 of this work in Noto District where we conducted the experimental in our apiary in  
528 Ishikawa Prefecture, Japan. As it can be seen from **Figure 8** that there is little difference in  
529 temperature change between in 2010 and in 2011, the difference in the intake of dinotefuran seems  
530 not to come from the difference in weather (temperature) condition between two years.

531 We now will consider the case where the insecticidal activity of dinotefuran through pollen paste  
532 can be almost equal to that through sugar syrup under the assumption that a food which is stored in  
533 cells can be regarded as the apparent intake of a food. The longer a period of storage of a food is, the  
534 more the apparent intake of a food becomes. Bee bread (pollen paste) is usually stored in cells shorter  
535 than honey (sugar syrup). Supposing that pollen paste is immediately ingested by honeybees without  
536 storing it in cells, the intake of dinotefuran in our previous work can be given by the sum of both the  
537 intake through sugar syrup and that through pollen paste without conversion and then the sum in our  
538 previous work fairly approaches to the intake in this work (310.7 ng/bee in DF-Low/Syrup, 290.3  
539 ng/bee in DF-High/Syrup). That is, the sum in our previous work for CASE 1 are 349.79 ng/bee in  
540 DF-Low, 310.01 ng/bee in DF-Middle and 211.59 ng/bee in DF-High. These values in our previous

541 work become closer to those in this work.

542 We can confirm from the above two cases that the results on pesticide effect in our previous work  
543 have been substantially replicated through this work.

544

#### 545 **Intake of food (sugar syrup, pollen paste) per bee**

546 Before discussing the intakes of the pesticide (dinotefuran), we will begin by discussing the intakes  
547 of foods (sugar syrup, pollen paste) per bee in **Table 5** which shows the details of experimental results  
548 for the two cases of CASE 1 and CASE 2. There are tabulated the total intake of pesticide through  
549 sugar syrup in a colony (DF-TISS) or that through pollen paste (DF-TIPP), the grand total number of  
550 honeybees in a colony (GTNH), the total intake of the pesticide (dinotefuran) per bee (DF-TISS per  
551 bee or DF-TIPP per bee), the total intake of sugar syrup in a colony (TISS), the total intake of pollen  
552 paste in a colony (TIPP), TISS per bee and TIPP per bee.

553 Compared with the estimated amount of sugar (about 1500 mg max. in total from larvae to foraging  
554 bees) reported by Rortais *et al.* (2005), which doubles when being converted into the amount of sugar  
555 syrup consisting of even amounts of sugar and water, every TISS per bee in **Table 5** is lower than  
556 3000 mg. TISS per bee ranges from 11 (DF-High/Pollen) to 590 mg/bee (DF-Low/Pollen) for CASE  
557 1 and from 132 (DF-High/Pollen) to 584 mg/bee (DF-Low/Pollen) for CASE 2 in this work, and  
558 ranges from 20 (DF-High) to 333 mg/bee (DF-Low) for CASE 1 and from 137 (DF-High) to 333  
559 mg/bee (DF-Low) for CASE 2 in our previous work. Therefore, sugar syrup seems to be ingested  
560 after it is diluted more than five times with nectar gathered in fields.

561 TISS per bee in Control is 367 mg/bee in this work for both cases of CASE 1 and CASE 2. This  
562 value in Control is on a level with or less than TISSes in DF-Low/Syrup (311 mg/bee) and DF-  
563 Low/Pollen (590 mg) for CASE 1, and is also on a level with or less than TISSes in DF-Low/Syrup  
564 (311 mg/bee) and DF-Low/Pollen (584 mg/bee) for CASE2, and then is much higher than TISSes in  
565 DF-High/Syrup (29 mg/bee) and DF-High/Pollen (11 mg/bee) for CASE 1 and is higher than TISSes  
566 in DF-High/Syrup (272 mg/bee) and DF-High/Pollen (132 mg/bee) for CASE 2 in this work. TISSes  
567 per bee in Controls are 205 and 182 mg/bee in previous work for both cases of CASE 1 and CASE 2;  
568 these values in Controls are less than TISS in DF-Low (333 mg/bee) and are slightly higher than TISS  
569 in DF-Middle (147 mg/bee) for CASE 1 and CASE 2, and then are much higher than TISS in DF-  
570 High (20 mg/bee) for CASE 1 and are higher than TISS in DF-High (137 mg/bee) for CASE 2 in our  
571 previous work.

572 TIPP per bee in Control is 58 mg/bee in this work for both cases of CASE 1 and CASE 2. This  
573 value in Control is less than TIPPes in DF-Low/Syrup (108 mg/bee) and DF-Low/Pollen (111 mg) for  
574 CASE 1 and is also less than TIPPes in DF-Low/Syrup (108 mg/bee) and DF-Low/Pollen (110 mg/bee)  
575 for CASE2, and then is higher than TIPPes in DF-High/Syrup (25 mg/bee) and DF-High/Pollen (12  
576 mg/bee) for CASE 1 and is less than TIPPes in DF-High/Syrup (109 mg/bee) and DF-High/Pollen (27  
577 mg/bee) for CASE 2 in this work. TIPPes per bee in Controls are 32 and 29 mg/bee in previous work  
578 for both cases of CASE 1 and CASE 2. These values in Controls are less than TIPP in DF-Low (49  
579 mg/bee) and are roughly on a level with TIPP in DF-Middle (24 mg/bee) for CASE 1 and CASE 2,  
580 and then are much higher than TIPP in DF-High (5 mg/bee) for CASE 1 and are on a level with TIPP  
581 in DF-High (29 mg/bee) for CASE 2 in our previous work.

582 It can be deduced that the neonicotinoid dinotefuran can be hardly repellent to honeybees at least  
583 at low concentrations where the intakes of foods are on a level with or more those in Control. Also at  
584 middle and high concentrations it seems probable that dinotefuran can hardly work repellently  
585 because honeybees continue to take toxic foods (sugar syrup, pollen paste) with dinotefuran enough  
586 for colony extinction. In spite of the presumption mentioned above, we cannot completely rule out a  
587 possibility that dinotefuran works repellently at middle or high concentrations, as it may appear to be  
588 due to a repellent effect that TISSes per bee and TIPPes per bee at middle or high concentrations are  
589 less than those at low concentrations.

590 Incidentally, each intake of foods in DF-High/Syrup and DF-High/Pollen for CASE 1 expectably  
591 becomes less than that for CASE 2, where pesticide-free foods were fed into an experimental colony

592 after a short period of pesticide administration, respectively. Examining carefully the intakes of foods  
593 for CASE 2, the intakes of foods only for a pesticide-free period are 394 mg/bee of sugar syrup and  
594 148 mg of pollen paste in DF-High/Syrup, and 459 mg/bee of sugar syrup and 62 mg of pollen paste  
595 in DF-High/Pollen, by estimating GTNH and the total intake of each food during a pesticide-free  
596 period. Though the intake of a toxic food is less in DF-High/Syrup or in DF-High/Pollen than the  
597 intake of food in Control, the intake of a nontoxic food increases up to the control level after the stop  
598 of pesticide administration.

599 Summering the above results, we can suggest the followings: (1) Dinotefuran seems hardly to work  
600 repellently for honeybees though it may cause anorexia at high concentrations: (2) At high  
601 concentrations of dinotefuran the provisioning of pesticide-free food can apparently recover the  
602 appetite but finally can allow leading to the extinction of colony after the exposure can cause a  
603 massive instant death and loss of appetite even for a short period of dosage: (3) The pesticide  
604 administered to a colony through sugar syrup seems to be diluted about five times (3000 mg /590 mg)  
605 in DF-Low/Pollen to about ten times (3000 mg/311 mg) in DF-Low/Syrup in this work. The dilution  
606 of toxic nectar will probably occurs actually in a hive in an apiary by adding pesticide-free nectar or  
607 pollen gathered in the fields. This means that high concentration neonicotinoid-pesticides in a field  
608 can act chronically after they are diluted with pesticide-free nectar, pollen, water, etc. which are  
609 foraged in the other fields and accumulated in a hive for a long period, because neonicotinoids is  
610 persistent (Yamada et al., 2012).

611

### 612 **Effect of pesticide intake through sugar syrup or pollen paste on a colony**

613 We will now focus on the intake of pesticide per bee in **Table 5**. The discussion about the impact  
614 of dinotefuran (pesticide) on a honeybee colony is described below in two cases of CASE 1 and CASE  
615 2 in comparison with our previous work (Yamada *et al.*, 2012).

616 **Figure 7** shows TISS per bee is roughly about five times as TIPP per bee. If examined in detail,  
617 we can find the difference in the ratios of DF-TISS per bee to DF-TIPP per bee which are about 5.1-  
618 fold (310.7/60.73) at a low concentration (DF-Low/Syrup, DF-Low/Pollen), about 4.5-fold  
619 (290.3/65.08) at a high concentration (DF-High/Syrup, DF-High/Pollen) for CASE 1 in this work.  
620 Each average is about 300 ng/bee from  $(310.7+290.3)/2$  through sugar syrup and about 63 ng/bee  
621 from  $(60.73+65.08)/2$  and the ratio of the averages is about 4.8.

622 It has been proposed in the previous section of this paper that an about 4.8-fold difference between  
623 DF-TISS per bee and DF-TIPP per bee may come from the difference in efficacy or that in storage  
624 period. It is natural that this difference is attributed to the difference between the insecticidal activities  
625 through sugar syrup and those through pollen paste on a honeybee colony judging from the fact that  
626 pollen affects brood rather than adult bees. It can, however, be also considered that the difference  
627 comes from the difference between the storage period of sugar syrup and that of pollen paste stored  
628 in cells, judging from the fact that pollen paste is ingested for a short period (Gillian, 1979; DeGrandi-  
629 Hoffman *et al.*, 2013) though sugar syrup is ingested for a long period after diluted with nontoxic  
630 nectar gathered from fields and stored in a hive.

631 We now dare to try to explain the reason for the result that DF-TISS per bee which was much  
632 higher than the LD<sub>50</sub> value of dinotefuran has not killed instantly all of honeybees in a colony,  
633 exploring the possibility to propose a new indicator for the assessment of persistent pesticide  
634 (dinotefuran) on colony failures such as a CCD and a wintering failure.

635 The reasons why DF-TISS per bee appears to be greater than the LD<sub>50</sub> value of dinotefuran for an  
636 adult bee (8 ng/bee to 61 ng/bee), which is reported in Iwasa *et al.* (2004) and US-EPA (2004), seem  
637 to be as follows: (1) The difference between the LD<sub>50</sub> and DF-TISS per bee comes from the difference  
638 between acute toxicity and chronic one which TISS possesses after diluted in cells with nontoxic  
639 nectar from fields. (2) A certain amount of dinotefuran in TISS is stored in combs as noxious honey,  
640 whose quantity changes with weather and seasonal conditions. (3) DF-TISS per bee is obtained from  
641 dividing DF-TISS by GTNH which is estimated with the error arisen from the assumptions described  
642 above. (4) The LD<sub>50</sub> is determined from the quantity of a pesticide dosed out to an adult bee only

643 once. In this work the intake of a pesticide (dinotefuran) is estimated from its quantity continuously  
644 taken by a honeybee through her life, without making an exception of a queen.

645 Here, we will discuss DF-TIPP per bee mainly for CASE 1. DF-TIPP per bee (60-65 ng/bee) in  
646 this work, where all of the experimental colonies finally have become extinct during experiments,  
647 appears to be slightly greater than and be approximately on a level with the LD<sub>50</sub>. We will examine  
648 the features on DF-TIPP and LD<sub>50</sub> as follows: (1) Whereas honey is stored in cells for a long period,  
649 pollen is done only for a short period (Gillian, 1979; DeGrandi-Hoffman *et al.*, 2013). Therefore,  
650 pollen taken by honeybees seems to be hardly stored and then be directly and immediately ingested  
651 by them without little dilution. (2) The LD<sub>50</sub> for an adult bee cannot be always applied for food such  
652 a larva which takes mainly pollen. (3) DF-TIPP per bee is obtained from dividing DF-TIPP by GTNH  
653 which is estimated with the error arisen from the assumptions. (4) The LD<sub>50</sub> is determined from the  
654 quantity of a pesticide dosed out to an adult bee only once. In this work the intake of a pesticide  
655 (dinotefuran) is estimated from its quantity continuously taken by a honeybee through her life, mainly  
656 during brood stages, without making an exception of a queen.

657 We now will consider whether TIPP in this work is valid for the usual amount of pollen taken by  
658 honeybees or not. TIPP per bee for CASE 1 in this work in **Table 5** (as pollen paste, 58 mg in Control,  
659 108 mg in DF-Low/Syrup, 111 mg in DF-Low/Pollen, 25 mg in DF-High/Syrup, 12 mg in DF-  
660 High/Pollen) seems to be reasonable because a honeybee consumes 112.5 mg to 195 mg of pollen in  
661 weigh in her life as reported by Crailsheim *et al.* (1992). Where 112.5 mg to 195 mg of pollen in  
662 weight is equivalent to 258.8 mg to 448.5 mg of pollen paste by multiplying the weight of pollen 2.3  
663 times because pollen paste consists of one pollen and 1.3 sugar syrup. As the total consumption of  
664 pollen paste in her life is more than TIPP per bee in this work, most of TIPP in this work can be hardly  
665 stored and can be ingested till colony extinction because pollen is usually stored only for a short  
666 period (Gillian, 1979; DeGrandi-Hoffman *et al.*, 2013), while honeybees seem to supply a need by  
667 gathering pollen into a colony from fields.

668 Incidentally, the fact that DF-TISS per bee and DF-TIPP per bee are almost constant regardless of  
669 each concentration, respectively, suggests that dinotefuran may be probably poorly metabolized and  
670 mostly accumulated in the tissues of bees as pointed out in our previous work.

671

## 672 **Indicator for colony collapse**

673 Although it is known that pesticides have an adverse effect on a honeybee in laboratory testing, the  
674 effect on a honeybee colony has been little elucidated in field testing. There are differences in  
675 susceptibility on a colony between field and laboratory tests to various factors such as environmental  
676 conditions, the behavior as a social insect, the storage of foods, the duration of the insecticidal effect  
677 and so on. LD<sub>50</sub> is the amount of the substance (pesticide) required (usually per body weight) to  
678 acutely kill 50% of the test population during a given short time (24, 48 hrs, etc) where an individual  
679 compulsorily takes the substance (pesticide). Thus LD<sub>50</sub> is an important indicator to evaluate the acute  
680 toxicity of a pesticide under limiting conditions but it can hardly assess the acute and chronic toxicities  
681 coexisting under practical field conditions, where the chronic toxicity is highly significant in  
682 persistent pesticides such as neonicotinoids. In field experiments conducted in a practical apiary the  
683 experimental concentration of a pesticide administered into a hive is changed by nectar, water and  
684 pollen with different concentrations gathered in fields. In a practical apiary honeybees are generally  
685 affected both acutely and chronically by pesticides. A honeybee colony collapses by various factors  
686 by which pesticides lead to the death of most honeybees due to acute toxicity, make honeybees feeble  
687 due to chronic toxicity to cause the infestations of mites and pathogens, cause them to lose their  
688 bearings due to chronic toxicity to cause them impossible to go back to their hive, cause the decrease  
689 in queen's egg laying performance due to both acute toxicity and chronic one, cause the imbalance of  
690 populations among members such as foraging bees, house bees and brood by the death of particular  
691 honeybees due to both acute toxicity and chronic one and so on. We, however, cannot find an indicator  
692 to evaluate and assess the both acutely and chronically toxic effects of a pesticide on a honeybee  
693 colony, where exposure of honeybees to an acute toxicity causes an instant death or impede the return

694 to their hive due to their physical weakening, and exposure to a chronic toxicity cause their  
695 disorientation because pesticides can affect the nerves. We will try to propose a new indicator  
696 (approach) to be able to assess the both effects of a persistent pesticide such as a neonicotinoid in a  
697 long-term field experiment.

698 Now, we will consider the possibility of DF-TISS per bee and DF-TIPP per bee as an indicator to  
699 assess the impact of persistent pesticide on a honeybee colony in a practical apiary. DF-TIPP per bee  
700 is almost the same and approximately 60 ng/bee both in CASE 1 and in CASE 2 regardless of  
701 concentration or period of pesticide administered into a honeybee colony. Surplus bee bread (pollen  
702 paste) is stored in cells and is consumed by honeybees in a relatively short span of time. This means  
703 that a honeybee colony seems to collapse when the intake of pesticide per bee is about 60 ng/bee  
704 regardless of acute or chronic toxicity if the pesticide is persistent and the efficacy is prolonged for a  
705 long period. It seems possible to use DF-TIPP per bee as an indicator to assess the colony collapse  
706 due to a persistent pesticide such as a neonicotinoid.

707 On the other hand DF-TISS per bee is much greater than DF-TIPP per bee and may be sometimes  
708 different between CASE 1 and CASE 2. The differences between CASE 1 and CASE 2 in DF-TISS  
709 per bee and between DF-TIPP per bee and DF-TISS per bee seems to be due to the storage of a  
710 pesticide such as a neonicotinoid which is hardly decomposed and is persistent. The amount of surplus  
711 honey (sugar syrup), which is able to be stored in cells for a long period, changes with the changes in  
712 environment such as the weather and the seasons. When DF-TISS per bee is greater than 60 ng/bee  
713 in a honeybee colony, the colony would be destined to collapse in due course of time even if it looks  
714 vigorous at a given time because honeybees in the colony continues to take stored toxic foods  
715 containing a persistent pesticide. If dinotefuran were easily decomposed and were not persistent, the  
716 toxicity in stored foods would lower with time, so that DF-TISS per bee of more than 60 ng /bee  
717 could not lead to the collapse in some cases.

718 Considering the wintering of a honeybee colony, honeybees, which have been newly born just  
719 before wintering, take toxic honey stored before winter in cells in a hive during wintering. If a  
720 honeybee continues to take only toxic honey containing dinotefuran during wintering till extinction  
721 under the assumptions that a honeybee takes the amount of sugar of 1500 mg in her life as reported  
722 by Rortais *et al.* (2005) and she dies by a dose of dinotefuran which is obtained from the estimation  
723 from DF-TIPP per bee in this work, we can assess the failure in wintering from the concentration of  
724 the pesticide included in honey in a hive. When thought is given to dinotefuran in this work, we can  
725 predict that a honeybee colony will collapse during wintering when honeybees continue to take toxic  
726 honey with a concentration higher than 40 ppb ( $60 \text{ [ng/bee]} / 1500 \text{ [mg]}$ ) of dinotefuran stored before  
727 wintering as they live several times longer in winter than in other seasons and cannot take other foods  
728 besides stored honey in winter. It can be suggested from the above that a failure in wintering will be  
729 caused by stored honey with a low concentration of a pesticide. The concentration of a certain  
730 persistent pesticide in stored honey can probably constitute an indicator of failure in wintering once  
731 the total intake of the pesticide per bee through pollen paste till colony extinction is determined.

732

### 733 **Plausible story of neonicotinoids sprayed in Japan**

734 Now, we can deduce one of plausible scenarios in Japan when rice paddy are sprayed with  
735 neonicotinoids which are systemic, persistent and high toxic, based on the facts obtained from our  
736 works.

737 After the rice seedlings treated by neonicotinoids are planted in a wet paddy in spring, the paddy  
738 is sprayed with neonicotinoids several times and the water in the wet paddy becomes contaminated  
739 with them. The contamination of the water lasts for a long period of time because of the persistent  
740 toxicity of them. When they are sprayed, the whole ecosystem in or near the rice paddy is  
741 contaminated by them. When their concentration is high, honeybees are killed instantaneously near  
742 the sprayed site. When they are low after diluted with the water in a rice paddy, honeybees are rarely  
743 killed on the sprayed site and carry the contaminated water with neonicotinoids into a hive, which  
744 have less repellent effect because they are odorless, tasteless and colorless. They use the water for

745 cooling the hive by evaporation and for thinning honey to be fed to larvae. The contents of the hive  
746 such as honeybees, brood, eggs, honey, pollen, cells on combs, and so on are exposed to the toxicity  
747 of the contaminated water for a long period of time because neonicotinoids are persistent.

748 Similar situations to water arise in nectar and pollen. Honeybees import toxic nectar and toxic  
749 pollen into a hive, transfer them to the colony members and store them in cells after changing them  
750 into honey and bee bread, respectively. Honey can be stored in cells for a much longer period than  
751 pollen. Pollen is taken preferentially by brood and a queen and honey preferentially by adult bees.  
752 Toxicity in nectar and pollen is often diluted with nontoxic nectar imported from the other fields and  
753 stored in cells as mildly toxic honey and as mildly toxic bee bread made by kneading toxic pollen  
754 with nontoxic nectar (honey), respectively. Incidentally, nontoxic pollen is sometimes changed into  
755 toxic bee bread after kneaded with toxic nectar (honey) and nontoxic honey is also changed into toxic  
756 one when thinned with toxic water and fed to larvae.

757 Mildly toxic foods (honey, bee bread and water) are ingested by foraging bees, house bees, brood,  
758 and a queen, or stored in combs. When larvae that ingest mildly toxic bee bread, water and honey  
759 become foraging bees, they become unable to return to a hive because of either disorientation or  
760 exhaustion due to chronic toxicity. The egg-laying capacity of a queen declines through ingestion of  
761 mildly toxic foods, but she survives till a colony collapses. The death of many foraging bees creates  
762 an imbalance in the proportion of house bees, foraging bees, capped brood, and larvae in a colony,  
763 leading to colony collapse. Even if it does not collapse and appears vigorous, pesticides impede egg  
764 laying of a queen and result in a decrease in the bees' immune strength, leading to infestations of  
765 mites, viruses, etc.

766 Put another way, when the pesticide concentration is high, the exposure to the pesticide causes an  
767 instantaneous death of bees due to acute toxicity. When the concentration is low, a CCD is caused by  
768 the exposure due to chronic toxicity. When the concentration is too low for a colony to become extinct  
769 before winter or honeybees take a low-concentration pesticide before winter, a failure in wintering is  
770 caused due to stored toxic foods or the aftereffect of the ingested pesticide even if toxic foods cannot  
771 be newly supplied into a colony during wintering. A CCD and a failure in wintering are phenomena  
772 characteristic of neonicotinoids, which are persistent, and can hardly be caused by organophosphates  
773 which are readily decomposed into their nontoxic components. We can apply this scenario on a rice  
774 paddy to an orchard and a farm.

775  
776

## 777 **Conclusion**

778 This study has reconfirmed the findings of our previous study (Yamada *et al.*, 2012) that a  
779 neonicotinoid such as dinotefuran causes the collapse and extinction of honeybee colonies after a  
780 honeybee colony has assumed the appearance of a CCD. The present results suggest that the  
781 insecticidal activity of dinotefuran in pollen paste (bee bread) on a honeybee colony is apparently  
782 roughly five times that in sugar syrup (honey or water), independently of pesticide concentration. On  
783 the other hand assuming that the difference between the intake of dinotefuran till the colony extinction  
784 through sugar syrup (honey) and that through pollen paste (bee bread) is due to the difference in a  
785 period of storage in a colony between honey and bee bread, the insecticidal activity of dinotefuran on  
786 a colony through sugar syrup can be considered to be almost equal to that through pollen paste.  
787 Further investigation on the difference in insecticidal activity on a colony is desired.

788 Although the intake of pesticide (dinotefuran) was enough to cause an instant death of a honeybee  
789 due to acute toxicity in this work judging from the LD<sub>50</sub>, we could find few dead bees near a hive and  
790 a colony dwindled away to nothing after assuming the appearance of a CCD due to chronic toxicity.  
791 The reason for a collapse of a colony due to chronic toxicity may be because sugar syrup and pollen  
792 paste containing the pesticide (dinotefuran) administered into a hive are diluted with nectar and pollen  
793 without pesticides in the experimental field which is controlled to be pesticide-free. Usually, foods  
794 for honeybees in certain fields (nectar, water, pollen) are contaminated by pesticides and ones in other  
795 fields are not done around an apiary. After the toxic foods are diluted with nontoxic ones and are



796 stored in cells of a comb, they continue to adversely affect a colony as neonicotinoids are extremely  
797 persistent as compared with the other pesticides such as organophosphates. As a result, they cause a  
798 CCD and a failure in wintering due to chronic toxicity. Even when water and honey are temporarily  
799 contaminated by a neonicotinoid and they are stored in a hive for a long period of time, these  
800 phenomena may occur because of its persistency, but when pollen is temporarily contaminated by it,  
801 these phenomena may not always occur because of the short-term storage of bee bread (Gillian, 1979;  
802 DeGrandi-Hoffman *et al.*, 2013).

803 Pesticide intake per bee till the colony extinction is greater than the LD<sub>50</sub> of dinotefuran in a  
804 honeybee, suggesting that the overall longevity of a colony, which behaves as one living creature,  
805 cannot be assessed by LD<sub>50</sub>, which is an indicator of acute toxicity to a honeybee. Pesticides impact  
806 honeybee colonies both acutely and chronically. In addition to LD<sub>50</sub> expressing acute toxicity for a  
807 individual honeybee, an indicator providing information on honeybee colony strength is urgently  
808 needed in order to assess long-term pesticide-dosage effects on a complicated colony system exposed  
809 to toxicity ranging from chronic to acute.

810 This work suggests that the total intake of pesticide per bee through pollen paste could constitute an  
811 indicator of a persistent pesticide toxicity to cause a colony collapse and a failure in wintering in a  
812 practical apiary because dinotefuran may be probably poorly metabolized and mostly accumulated in  
813 the tissues of bees based on the result in this work that its insecticidal activity was independent from  
814 its concentration. By determining the intake through pollen paste to cause colony extinction and  
815 analyzing a concentration of the pesticide in honey before winter, we will probably judge the  
816 possibility of a failure in wintering because honeybees take mainly stored honey. Once we determine  
817 the total intake through pollen paste to cause colony extinction, we can judge the possibility of a CCD  
818 after measuring the concentrations of the pesticide in stored foods (honey and bee bread) and the  
819 average longevity of honeybees.

820 Based on this work and previous one (Yamada *et al.*, 2012), the following story will sound very  
821 convincing: When a pesticide is sprayed and dissolved in the water of a rice paddy or an orchard at  
822 low concentrations and is imported from fields to a colony by foraging bees, it continues to affect the  
823 colony for a long time and finally leads to a colony collapse or a failure of wintering. Even when a  
824 colony does not collapse and appears vigorous, insecticidal toxicity impedes the queen's egg-laying  
825 capacity and reduces the bees' immunity, shortening their lives or leading to mite infestations in the  
826 colony.

827  
828  
829 A neonicotinoid of very low concentration, which cannot be analytically detected, continues to  
830 gradually accumulate in the tissues of organisms over a long term and cause great harm to them. Thus,  
831 because of their high toxicity and relative nondegradability, neonicotinoids may be described as  
832 "agro-poisons" rather than agro-chemicals.

833 Since their creation in 1985, neonicotinoids have been commercially available from the early 1990s,  
834 and their advantages and disadvantages have been extensively discussed. Serious threats posed to  
835 nontarget animals, including human beings, have been revealed. For example, it is strongly suspected  
836 that neonicotinoids have caused a marked worldwide decline in freshwater arthropods, honeybees  
837 (*Apis mellifera*), butterflies, red dragonflies, and sparrows and have exerted adverse effects on the  
838 human brain through their neurotoxicity (Beketov and Liess, 2008; JEPA, 2010; Kimura- Kuroda *et al.*,  
839 *et al.*, 2012a). Neonicotinoids may be poorly metabolized and mostly accumulated chronically in the  
840 tissues of bees at low concentrations. These may also represent a toxic threat to human beings (JEPA,  
841 2010; Taira, 2012a, 2012b; Kimura-Kuroda *et al.*, 2012b), and we are fearful of a nightmare scenario  
842 in which Harm to honeybees can be applicable to human beings, and neonicotinoids may lead to the  
843 collapse of the Earth's ecosystem.

844  
845

## 846 **Acknowledgments**

847 We would like to express our gratitude to Ms. Rie Katsumata and Ms. Hiroko Nakamura, who  
848 made an enormous contribution to the accurate counting of the numbers of adult bees and capped  
849 brood by their arduous efforts. Here, we would also like to take this opportunity to thank all the  
850 individuals who assisted us in our research. This research was supported in part by Yamada Research  
851 Grant.

852  
853

### 854 **Author Contributions**

855 TY, KY and YY conceived and designed the experiments. TY and KY performed the experiments.  
856 TY and YY analyzed the data. TY and YY contributed reagents/materials/analysis tools. TY, YY and  
857 KY wrote the paper.

858

## References

- 859  
860
- 861 ALAUX, C; BRUNET, J-L; DUSSAUBAT, C; MONDET, F; TCHAMITCHAN, S; COUSIN, M;  
862 BRILLARD, J; BALDY, A; BELZUNCES, L P; CONTE, Y L (2010) Interactions between  
863 nosema microspores and a neonicotinoid weaken honeybees (*Apis mellifera*) *Environmental*  
864 *Microbiology* 12(3): 774–782 [HTTP://ONLINELIBRARY.WILEY.COM/DOI/10.1111/J.1462-](http://ONLINELIBRARY.WILEY.COM/DOI/10.1111/J.1462-2920.2009.02123.X/FULL)  
865 [2920.2009.02123.X/FULL](http://ONLINELIBRARY.WILEY.COM/DOI/10.1111/J.1462-2920.2009.02123.X/FULL)
- 866 BEKETOV, M A; LIESS, M (2008) Acute and delayed effects of the neonicotinoid insecticide  
867 thiacloprid on seven freshwater ARTHROPODS. *Environmental Toxicology and Chemistry*  
868 27(2): 461-470. [http://onlinelibrary.wiley.com/doi/10.1897/07-](http://onlinelibrary.wiley.com/doi/10.1897/07-322R.1/abstract?deniedAccessCustomisedMessage=&userIsAuthenticated=false)  
869 [322R.1/abstract?deniedAccessCustomisedMessage=&userIsAuthenticated=false](http://onlinelibrary.wiley.com/doi/10.1897/07-322R.1/abstract?deniedAccessCustomisedMessage=&userIsAuthenticated=false)
- 870 CALDERONE, N W (2012) Insect Pollinated Crops, Insect pollinators and US agriculture: Trend  
871 analysis of aggregate data for the period 1992–2009. *PLoS ONE* 7(5): e37235.  
872 <http://www.plosone.org/article/info%3Adoi%2F10.1371%2Fjournal.pone.0037235>
- 873 CIARLO, T J; MULLIN, C A; FRAZIER, J L; SCHMEHL, D R (2012) Learning Impairment in  
874 Honey Bees Caused by Agricultural Spray Adjuvants. *PLoS ONE* 7(7): e40848  
875 <http://www.plosone.org/article/info%3Adoi%2F10.1371%2Fjournal.pone.0040848>
- 876 COLIN, M E; BONMATIN, J M; MOINEAU, I; GAIMON, C; BRUN, S; VERMANDERE, J P  
877 (2004) A method to quantify and analyze the foraging activity of honeybees: Relevance to the  
878 sublethal effects induced by systemic insecticides. *Archives of Environmental Contamination and*  
879 *Toxicology* 47: 387-395 <http://www.ncbi.nlm.nih.gov/pubmed/15386133>
- 880 COX-FOSTER, D L; CONLAN, S; HOLMES, E C; PALACIOS, G; EVANS, J D; MORAN, N A;  
881 QUAN, P-L; BRIESE, T; HORNIG, M; GEISER, D M; MARTINSON, V; VAN ENGELSDORP,  
882 D; KALKSTEIN, A L; DRYSDALE, A; HUI, J; ZHAI, J; CUI, L; HUTCHISON, S K; SIMONS,  
883 J F; EGHOLM, M; PETTIS, J S; LIPKIN, W I (2007) A metagenomic survey of microbes in  
884 Honey Bee Colony Collapse Disorder. *Science* 318: 283-287  
885 <http://www.sciencemag.org/content/318/5848/283.short>
- 886 CRAILSHEIM, K; SCHNEIDER, L H; HRASSNIGG, N; BÜHLMANN, G; BROSCH, U (1992)  
887 Pollen consumption and utilization in worker honeybees (*Apis Mellifera Carnica*): Dependence  
888 on individual age and function. *Journal of Insect Physiology* 38(6): 409-419.  
889 <http://www.sciencedirect.com/science/article/pii/002219109290117V>
- 890 DEGRANDI-HOFFMAN, G; ECKHOLM, B J; HUANG, M H (2013) A comparison of bee bread  
891 made by Africanized and European bees (*Apis mellifera*) and its effects on hemolymph protein  
892 titers. *Apidologie* 44: 52–63. [http://link.springer.com/article/10.1007%2Fs13592-012-0154-](http://link.springer.com/article/10.1007%2Fs13592-012-0154-9#page-1)  
893 [9#page-1](http://link.springer.com/article/10.1007%2Fs13592-012-0154-9#page-1)
- 894 EL HASSANI, A K; DACHER, M; GARY, V; LAMBIN, M; GAUTHIER, M; ARMENGAUD, C  
895 (2008) Effects of sublethal doses of acetamiprid and thiamethoxam on the behavior of the  
896 honeybee (*Apis mellifera*). *Archives of Environmental Contamination and Toxicology* 54: 653-  
897 661. <http://link.springer.com/article/10.1007/s00244-007-9071-8#page-1>
- 898 GILL, R J; RAMOS-RODRIGUEZ, O; RAINE, N E (2012) Combined pesticide exposure severely  
899 affects individual-and colony-level traits in bees. *Nature* 491: 105-108.

- 900 <http://www.nature.com/nature/journal/v491/n7422/abs/nature11585.html>
- 901 GILLIAN, M (1979) Microbiology of pollen and bee bread: The yeasts. *Apidologie* 10(1): 43-53.
- 902 HENRY, M; BEGUIN, M; REQUIER, F; ROLLIN, O; ODOUX, J –F; AUPINEL, P; APTEL, J;
- 903 TCHAMITCHIAN, S; DECOURTYE, A (2012) A common pesticide decreases foraging success
- 904 and survival in honeybees. *Science* 336: 348-350.
- 905 [http://www.apidologie.org/articles/apido/pdf/1979/01/Apidologie\\_0044-](http://www.apidologie.org/articles/apido/pdf/1979/01/Apidologie_0044-8435_1979_10_1_ART0006.pdf)
- 906 [8435\\_1979\\_10\\_1\\_ART0006.pdf](http://www.apidologie.org/articles/apido/pdf/1979/01/Apidologie_0044-8435_1979_10_1_ART0006.pdf)
- 907 IWASA, T; MOTOYAMA, N; AMBROSE, J T; ROE, R M (2004) Mechanism for the differential
- 908 toxicity of neonicotinoid insecticides in the honey bee. *Crop Protection* 23: 371–378.
- 909 <http://www.sciencedirect.com/science/article/pii/S0261219403002308>
- 910 JAPAN ENDOCRINE-DISRUPTOR PREVENTIVE ACTION (JEPA) (2010) The threat of
- 911 neonicotinoid pesticides on honeybees, ecosystems, and humans.
- 912 [http://kokumin-kaigi.sakura.ne.jp/kokumin/wp-content/uploads/Neonicotinoid\\_e.pdf](http://kokumin-kaigi.sakura.ne.jp/kokumin/wp-content/uploads/Neonicotinoid_e.pdf)
- 913 THE JAPAN FOOD CHEMICAL RESEARCH FOUNDATION (JFCRF) (2014) Maximum Residue
- 914 Limits (MRLs) of Agricultural Chemicals in Foods: Compositional Specification for Foods
- 915 (Updated on January 30, 2014). The Japanese Positive List System for Agricultural Chemical
- 916 Residues in Foods (Document released by Ministry of Health, Labour and Welfare).
- 917 <http://www.ffcr.or.jp/zaidan/FFCRHOME.nsf/pages/MRLs-p>
- 918 JOHNSON, R M; ELLIS, M D; MULLIN, C A; FRAZIER, M (2010) Pesticides and honey bee
- 919 toxicity – USA. *Apidologie* 41: 312-331.
- 920 <http://www.apidologie.org/articles/apido/pdf/2010/03/m09141.pdf>
- 921 KAKUTA, H; GEN, M; KAMIMOTO, Y; HORIKAWA, Y (2011) Honeybee exposure to
- 922 clothianidin: analysis of agrochemicals using surface enhanced Raman spectroscopy. *Research*
- 923 *Bulletin of Obihiro University* 32: 31-36.
- 924 <http://jglobal.jst.go.jp/public/20090422/201102260879015920>
- 925 KIMURA-KURODA, J; KOMUTA, Y; KURODA, Y; HAYASHI, M; KAWANO, H (2012a)
- 926 Nicotine-like effects of the neonicotinoid insecticides acetamiprid and imidacloprid on cerebellar
- 927 neurons from neonatal rats. *PLoS ONE* 7(2): e32432.
- 928 [http://www.plosone.org/article/fetchObject.action?uri=info%3Adoi%2F10.1371%2Fjournal.pone](http://www.plosone.org/article/fetchObject.action?uri=info%3Adoi%2F10.1371%2Fjournal.pone.0032432&representation=PDF)
- 929 [e.0032432&representation=PDF](http://www.plosone.org/article/fetchObject.action?uri=info%3Adoi%2F10.1371%2Fjournal.pone.0032432&representation=PDF)
- 930 KIMURA-KURODA, J; KOMUTA, Y; KAWANO, H (2012b) The effects of neonicotinoid pesticide
- 931 on humans and mammals. *Japanese Journal of Clinical Ecology* 21(1): 46-56.
- 932 [http://www.asahikawa-med.ac.jp/dept/mc/healthy/jsce/jjce21\\_1\\_46.pdf](http://www.asahikawa-med.ac.jp/dept/mc/healthy/jsce/jjce21_1_46.pdf)
- 933 LAURINO, D; PORPORATO, M; PATETTA, A; MANINO, A (2011) Toxicity of neonicotinoid
- 934 insecticides to honey bees: laboratory tests. *Bulletin of Insectology* 64 (1): 107-113
- 935 <http://smallbluemarble.org.uk/wp-content/uploads/2012/04/Laurino-2011.pdf>
- 936 LEBUHN, G; DROEGE, S; CONNOR, E F; GEMMILL-HERREN, B; POTTS, S G; MINCKLEY,
- 937 R L; GRISWOLD, T; JEAN, R; KULA, E; ROUBIK, D W; CANE, J; WRIGHT, K W; FRANKIE,
- 938 G; PARKER, F (2013) Detecting Insect Pollinator Declines on Regional and Global Scales.

- 939 *Conservation Biology* 27(1): 113–120 [http://onlinelibrary.wiley.com/doi/10.1111/j.1523-](http://onlinelibrary.wiley.com/doi/10.1111/j.1523-1739.2012.01962.x/abstract;jsessionid=D2DC0A15D9DDF9099EA652C0318D6012.f04t01?deniedAccessCustomisedMessage=&userIsAuthenticated=false)  
940 [1739.2012.01962.x/abstract;jsessionid=D2DC0A15D9DDF9099EA652C0318D6012.f04t01?de](http://onlinelibrary.wiley.com/doi/10.1111/j.1523-1739.2012.01962.x/abstract;jsessionid=D2DC0A15D9DDF9099EA652C0318D6012.f04t01?deniedAccessCustomisedMessage=&userIsAuthenticated=false)  
941 [niedAccessCustomisedMessage=&userIsAuthenticated=false](http://onlinelibrary.wiley.com/doi/10.1111/j.1523-1739.2012.01962.x/abstract;jsessionid=D2DC0A15D9DDF9099EA652C0318D6012.f04t01?deniedAccessCustomisedMessage=&userIsAuthenticated=false)
- 942 LAYCOCK, I; LENTHALL, K M; BARRATT, A T; CRESSWELL, J E (2012) Effects of  
943 imidacloprid, a neonicotinoid pesticide, on reproduction in worker bumblebees (*Bombus*  
944 *terrestris*). *Ecotoxicology* 21: 1937-1945. [http://link.springer.com/article/10.1007/s10646-012-](http://link.springer.com/article/10.1007/s10646-012-0927-y#page-1)  
945 [0927-y#page-1](http://link.springer.com/article/10.1007/s10646-012-0927-y#page-1)
- 946 LU, C; WARCHOL, K M; CALLAHAN, R A (2012) In situ replication of honeybee colony collapse  
947 disorder. *Bulletin of Insectology* 65(1): 99-106.  
948 <http://www.bulletinofinsectology.org/pdfarticles/vol65-2012-099-106lu.pdf>
- 949 LU, C; WARCHOL, K M; CALLAHAN, R A (2014) Sub-lethal exposure to neonicotinoids impaired  
950 honey bees winterization before proceeding to colony collapse disorder. *Bulletin of Insectology*  
951 67(1): 125-130. <http://www.bulletinofinsectology.org/pdfarticles/vol67-2014-125-130lu.pdf>
- 952 MARZARO, M; VIVAN, L; TARGA, A; MAZZON, L; MORI, N; GREATTI, M; TOFFOLO, E P;  
953 DI BEMARDO, A; GIORIO, C; MARTON, D; TAPPARO, A; GIROLAMI, V (2011) Lethal  
954 aerial powdering of honey bees with neonicotinoids from fragments of maize seed coat. *Bulletin*  
955 *of Insectology* 64(1): 119-126.  
956 [http://www.moraybeedinosaurs.co.uk/neonicotinoid/aerial%20powdering%20of%20honey%20b](http://www.moraybeedinosaurs.co.uk/neonicotinoid/aerial%20powdering%20of%20honey%20bees%20with%20neonicotinoids.pdf)  
957 [ees%20with%20neonicotinoids.pdf](http://www.moraybeedinosaurs.co.uk/neonicotinoid/aerial%20powdering%20of%20honey%20bees%20with%20neonicotinoids.pdf)
- 958 MATSUMOTO, T (2013) Reduction in homing flights in the honey bee *Apis mellifera* after a  
959 sublethal dose of neonicotinoid insecticides. *Bulletin of Insectology* 66(1): 1-9.  
960 <http://www.bulletinofinsectology.org/pdfarticles/vol66-2013-001-009matsumoto.pdf>
- 961 NEUMANN, P; CARRECK, N L (2010) Honey bee colony losses. *Journal of Apicultural Research*  
962 49(1): 1-6. <http://www.ask-force.org/web/Bees/Neumann-Honey-Bee-Colony-Losses-2010.pdf>
- 963 PETTIS, J S; VANENGELSDORP, D; JOHNSON, J; DIVELY, G (2012) Pesticide exposure in honey  
964 bees results in increased levels of the gut pathogen Nosema. *Naturwissenschaften* 99: 153-158  
965 <http://link.springer.com/article/10.1007/s00114-011-0881-1#page-1>
- 966 POTTS, S G; BIESMEIJER, J C; KREMEN, C; NEUMANN, P; SCHWEIGER, O; KUNIN, W E  
967 (2010) Global pollinator declines: trends, impacts and drivers. *Trends in Ecology and Evolution*  
968 25(6): 345-353 <http://www.sciencedirect.com/science/article/pii/S0169534710000364>
- 969 RORTAIS, A; ARNOLD, G; HALM, M –P; TOUFFET-BRIENS, F (2005) Modes of honeybees  
970 exposure to systemic insecticides: estimated amounts of contaminated pollen and nectar  
971 consumed by different categories of bees. *Apidologie* 36: 71-83.  
972 <http://www.apidologie.org/articles/apido/pdf/2005/01/M4053.pdf>
- 973 SCHNEIDER, C W; TAUTZ, J; GRÜNEWALD, B; FUCHS, S (2012) RFID Tracking of sublethal  
974 effects of two neonicotinoid insecticides on the foraging behavior of *Apis mellifera*. *PLoS ONE*  
975 7(1): e30023.  
976 [http://www.plosone.org/article/fetchObject.action?uri=info%3Adoi%2F10.1371%2Fjournal.pone](http://www.plosone.org/article/fetchObject.action?uri=info%3Adoi%2F10.1371%2Fjournal.pone.0030023&representation=PDF)  
977 [e.0030023&representation=PDF](http://www.plosone.org/article/fetchObject.action?uri=info%3Adoi%2F10.1371%2Fjournal.pone.0030023&representation=PDF)

- 978 STEINHAUER, N A; RENNICH, K; WILSON, M E; CARON, D M; LENGERICH, E J; PETTIS, J  
979 S; ROSE, R; SKINNER, J A; TARPY, D R; WILKES, J T; VANENGELSDORP, D (2014) A  
980 national survey of managed honey bee 2012-2013 annual colony losses in the USA: results from  
981 the Bee Informed Partnership. *Journal of Apicultural Research* 53(1): 1-18.  
982 <http://dx.doi.org/10.3896/IBRA.1.53.1.01>
- 983 TAIRA, K (2012a) Health effects of neonicotinoid insecticides. Part 1: Physicochemical  
984 Characteristics and Case Reports. *Japanese Journal of Clinical Ecology* 21(1): 24-34.  
985 [http://www.asahikawa-med.ac.jp/dept/mc/healthy/jsce/jjce21\\_1\\_24.pdf](http://www.asahikawa-med.ac.jp/dept/mc/healthy/jsce/jjce21_1_24.pdf)
- 986 TAIRA, K (2012b) Health effects of neonicotinoid insecticides. Part 2: Pharmacology, Application,  
987 Regulation, and Discussion. *Japanese Journal of Clinical Ecology* 21(1): 35-45.  
988 [http://www.asahikawa-  
989 med.ac.jp/dept/mc/healthy/jsce/jjce21\\_1\\_35.pdf#search='%E3%83%8D%E3%82%AA%E3%83%  
990 %8B%E3%82%B3%E3%83%81%E3%83%8E%E3%82%A4%E3%83%89%E7%B3%BB%E6  
991 %AE%BA%E8%99%AB%E5%89%A4%E3%81%AE%E3%83%92%E3%83%88%E3%81%B  
992 8%E3%81%AE%E5%BD%B1%E9%9F%BF+%E3%81%9D%E3%81%AE%EF%BC%92+%E  
993 5%B9%B3+%E8%87%A8%E5%BA%8A%E7%92%B0%E5%A2%83'](http://www.asahikawa-med.ac.jp/dept/mc/healthy/jsce/jjce21_1_35.pdf#search='%E3%83%8D%E3%82%AA%E3%83%8B%E3%82%B3%E3%83%81%E3%83%8E%E3%82%A4%E3%83%89%E7%B3%BB%E6%AE%BA%E8%99%AB%E5%89%A4%E3%81%AE%E3%83%92%E3%83%88%E3%81%B8%E3%81%AE%E5%BD%B1%E9%9F%BF+%E3%81%9D%E3%81%AE%EF%BC%92+%E5%B9%B3+%E8%87%A8%E5%BA%8A%E7%92%B0%E5%A2%83')
- 994 TANIGUCHI, T; KITA, Y; MATSUMOTO, T; KIMURA, K (2012) Honeybee colony losses during  
995 2008-2010 caused by pesticide application in Japan. *Journal of Apiculture* 27(1): 15-27.  
996 <http://www.dbpia.co.kr/Journal/ArticleDetail/2163286>
- 997 TEETERS, B S; JOHNSON, R M; ELLIS, M D; SIEGFRIED, B D (2012) Using video-tracking to  
998 assess sublethal effects of pesticides on honey bees (*Apis mellifera* L.). *Environmental Toxicology*  
999 *and Chemistry* 31(6): 1349-1354. <http://onlinelibrary.wiley.com/doi/10.1002/etc.1830/full>
- 1000 UNITED STATES ENVIRONMENTAL PROTECTION AGENCY (US-EPA) (2004) *Pesticide Fact*  
1001 *Sheet*, Name of Chemical: Dinotefuran  
1002 [http://www.epa.gov/opp00001/chem\\_search/reg\\_actions/registration/fs\\_PC-044312\\_01-Sep-  
1003 04.pdf#search='Pesticide+Fact+Sheet%2C+Name+of+Chemical%3A+Dinotefuran'](http://www.epa.gov/opp00001/chem_search/reg_actions/registration/fs_PC-044312_01-Sep-04.pdf#search='Pesticide+Fact+Sheet%2C+Name+of+Chemical%3A+Dinotefuran')
- 1004 VAN DER SLUIJS, J P; SIMON-DELISO, N; GOULSON, D; MAXIM, L; BONMATIN, J-M;  
1005 BELZUNCES, L P (2013) Neonicotinoids, bee disorders and the sustainability of pollinator  
1006 services. *Current Opinion in Environmental Sustainability* 5:1-13  
1007 <http://dx.doi.org/10.1016/j.cosust.2013.05.007>
- 1008 VAN DER ZEE, R; BRODSCHNEIDER, R; BRUSBARDIS, V; CHARRIÈRE, J-D; CHLEBO, R;  
1009 COFFEY, M F; DAHLE, B; DRAZIC, M M; KAUKO, L; KRETAVICIUS, J; KRISTIANSEN,  
1010 P; MUTINELLI, F; OTTEN, C; PETERSON, M; RAUDMETS, A; SANTRAC, V; SEPPÄLÄ,  
1011 A; SOROKER, V; TOPOLSKA, G; VEJSNÆS, F; ALISON GRAY, A; (2014) Results of  
1012 international standardised beekeeper surveys of colony losses for winter 2012-2013: analysis of  
1013 winter loss rates and mixed effects modelling of risk factors for winter loss. *Journal of*  
1014 *Apicultural Research* 53(1): 19-34. <http://dx.doi.org/10.3896/IBRA.1.53.1.02>
- 1015 VAN ENGELSDORP, D; CARON, D; HAYES, J; UNDERWOOD, R; HENSON, M; RENNICH, K;  
1016 SPLEEN, A; ANDREE, M; SNYDER, R; LEE, K; ROCCASECCA, K; WILSON, M; WILKES,

- 1017 J; LENGERICH, E; PETTIS, J (2012) A national survey of managed honeybee 2010-11 winter  
1018 colony losses in the USA: Results from the Bee Informed Partnership. *Journal of Apicultural*  
1019 *Research* 51(1): 115-124.  
1020 <http://www.ibra.org.uk/articles/US-honey-bee-winter-colony-losses-2010-11>
- 1021 VAN TOMÉ, H V; MARTINS, G F; LIMA, M A P; CAMPOS, L A O; GUEDES, R N C (2012)  
1022 Imidacloprid-induced impairment of mushroom bodies and behavior of the native stingless bee  
1023 *melipona quadrifasciata anthidioides*. *PLoS ONE* 7(6): e38406.  
1024 <http://www.plosone.org/article/fetchObject.action?uri=info%3Adoi%2F10.1371%2Fjournal.pone.0038406&representation=PDF>
- 1026 VISSER, A; BLACQUIÈRE, T (2010) Survival rate of honeybee (*Apis mellifera*) workers after  
1027 exposure to sublethal concentrations of imidacloprid. *Proceedings of the Netherlands*  
1028 *Entomological Society Meeting* 21: 29-34.  
1029 <http://smallbluemarble.org.uk/wp-content/uploads/2012/04/029-034-VisserBlacquiere-2010.pdf>
- 1030 WHITEHORN, P R; O'CONNOR, S; WACKERS, F L; GOULSON, D (2012) Neonicotinoid  
1031 pesticide reduces bumblebee colony growth and queen production. *Science* 336: 351-352.  
1032 <http://www.sciencemag.org/content/336/6079/351>
- 1033 YAMADA, T; YAMADA, K; WADA, N (2012) Influence of dinotefuran & clothianidin on a bee  
1034 colony. *Japanese Journal of Clinical Ecology* 21(1): 10-23.  
1035 <http://dspace.lib.kanazawa-u.ac.jp/dspace/bitstream/2297/37606/1/SC-PR-YAMADA-T-10.pdf>
- 1036 YANG, E C; CHUANG, Y C; CHEN, Y L; CHANG, L H (2008) Abnormal foraging behavior  
1037 induced by sublethal dosage of imidacloprid in the honey bee (*Hymenoptera: Apidae*). *Journal of*  
1038 *Economic Entomology* 101(6): 1743-1748.  
1039 <http://www.bioone.org/doi/abs/10.1603/0022-0493-101.6.1743>
- 1040 YANG, E.C; CHANG, H C; WU, W Y; CHEN, Y W (2012) Impaired olfactory associative behavior  
1041 of honeybee workers due to contamination of imidacloprid in the larval stage. *PLoS ONE* 7(11):  
1042 e49472.  
1043 <http://www.plosone.org/article/fetchObject.action?uri=info%3Adoi%2F10.1371%2Fjournal.pone.0049472&representation=PDF>  
1044  
1045  
1046  
1047

1048  
1049  
1050  
1051  
1052  
1053  
1054  
1055  
1056  
1057  
1058  
1059  
1060  
1061  
1062  
1063  
1064  
1065  
1066  
1067  
1068  
1069  
1070  
1071  
1072  
1073  
1074  
1075  
1076  
1077  
1078  
1079  
1080  
1081  
1082  
1083  
1084  
1085  
1086  
1087  
1088  
1089  
1090  
1091  
1092

## Figure Legends

### **Figure 1 Change in number of Adult bees**

The pesticide (dinotefuran) was administered through either sugar syrup or pollen paste, the latter consisting of 10 parts of pollen without dinotefuran and 13 parts of sugar syrup with dinotefuran. This was prepared by mixing the pollen substitute BB Food A<sup>®</sup> (Bee Culture Laboratory Co., Japan) with pure pollen at a ratio of 1:1. Control: without dinotefuran. DF-Low/Syrup: 1 ppm dinotefuran in sugar syrup. DF-Low/Pollen: 0.565 ppm dinotefuran in pollen paste, consisting of 10 parts of pollen without dinotefuran and 13 parts of sugar syrup with 1 ppm dinotefuran. DF-High/Syrup: 10 ppm dinotefuran in sugar syrup; the sugar syrup without dinotefuran was administered on and after July 16, 2011. DF-High/Pollen: 5.65 ppm dinotefuran in pollen paste, consisting of 10 parts of pollen without dinotefuran and 13 parts of sugar syrup with 10 ppm dinotefuran; the pollen paste without dinotefuran was administered on and after July 16, 2011. In DF-Low/Pollen, the administration of dinotefuran through pollen paste was discontinued with keeping feeding pesticide-free sugar syrup on December 3, 2011. On December 17, 2011, colonies of Control and DF-Low/Pollen entered their wintering after pesticide-free sugar syrup was discontinued. We observed the two colonies during wintering on February 16, 2012 choosing a fine day in order to avoid an adverse effect on the colonies and found that the colony of DF-Low/Pollen had become extinct, whereas the colony of Control survived.

### **Figure 2 Change in number of capped brood**

### **Figure 3 Change in number of dead bees**

The marked increase in the number of dead bees observed immediately after the start of the experiment was because of pesticide (dinotefuran) toxicity. Incidentally, from mid-September, the sudden increases of dead bee was due to attack by Asian giant hornets.

### **Figure 4 Difference in state on comb between at the start of experiment and just before colony extinction**

Administration of the pesticide (dinotefuran) in DF-Low/Syrup was continued to colony extinction, but only at the start of the experiment in DF-High/Syrup. A queen remained alive on the verge of colony extinction, when the previously vigorous colony assumed the appearance of a CCD.

### **Figure 5 Comparison of the DF-Low/Pollen colony at the start of the experiment and just before wintering**

The upper and lower images are representative combs with honeybees at the start of the experiment and immediately before wintering (existence of the queen confirmed), respectively. The colony appeared vigorous before wintering but became extinct during wintering.

### **Figure 6 Change in the total intake of dinotefuran**

In DF-High/Sugar syrup and In DF-High/Pollen, the pesticide (dinotefuran) was administered only once at the start of the experiment.

### **Figure 7 Total intake of dinotefuran per bee for CASE 1**

The total intake of dinotefuran per bee in our previous work was obtained from the sum of dinotefura through sugar syrup after that through pollen paste which was converted into that through sugar syrup



1093 using the relation in this work between that through sugar syrup and that through pollen paste.

1094

1095 **Figure 8 Change in temperature near the experimental site during two weeks from the start in**  
1096 **2010 (previous work) and in 2011 (this work)**

1097

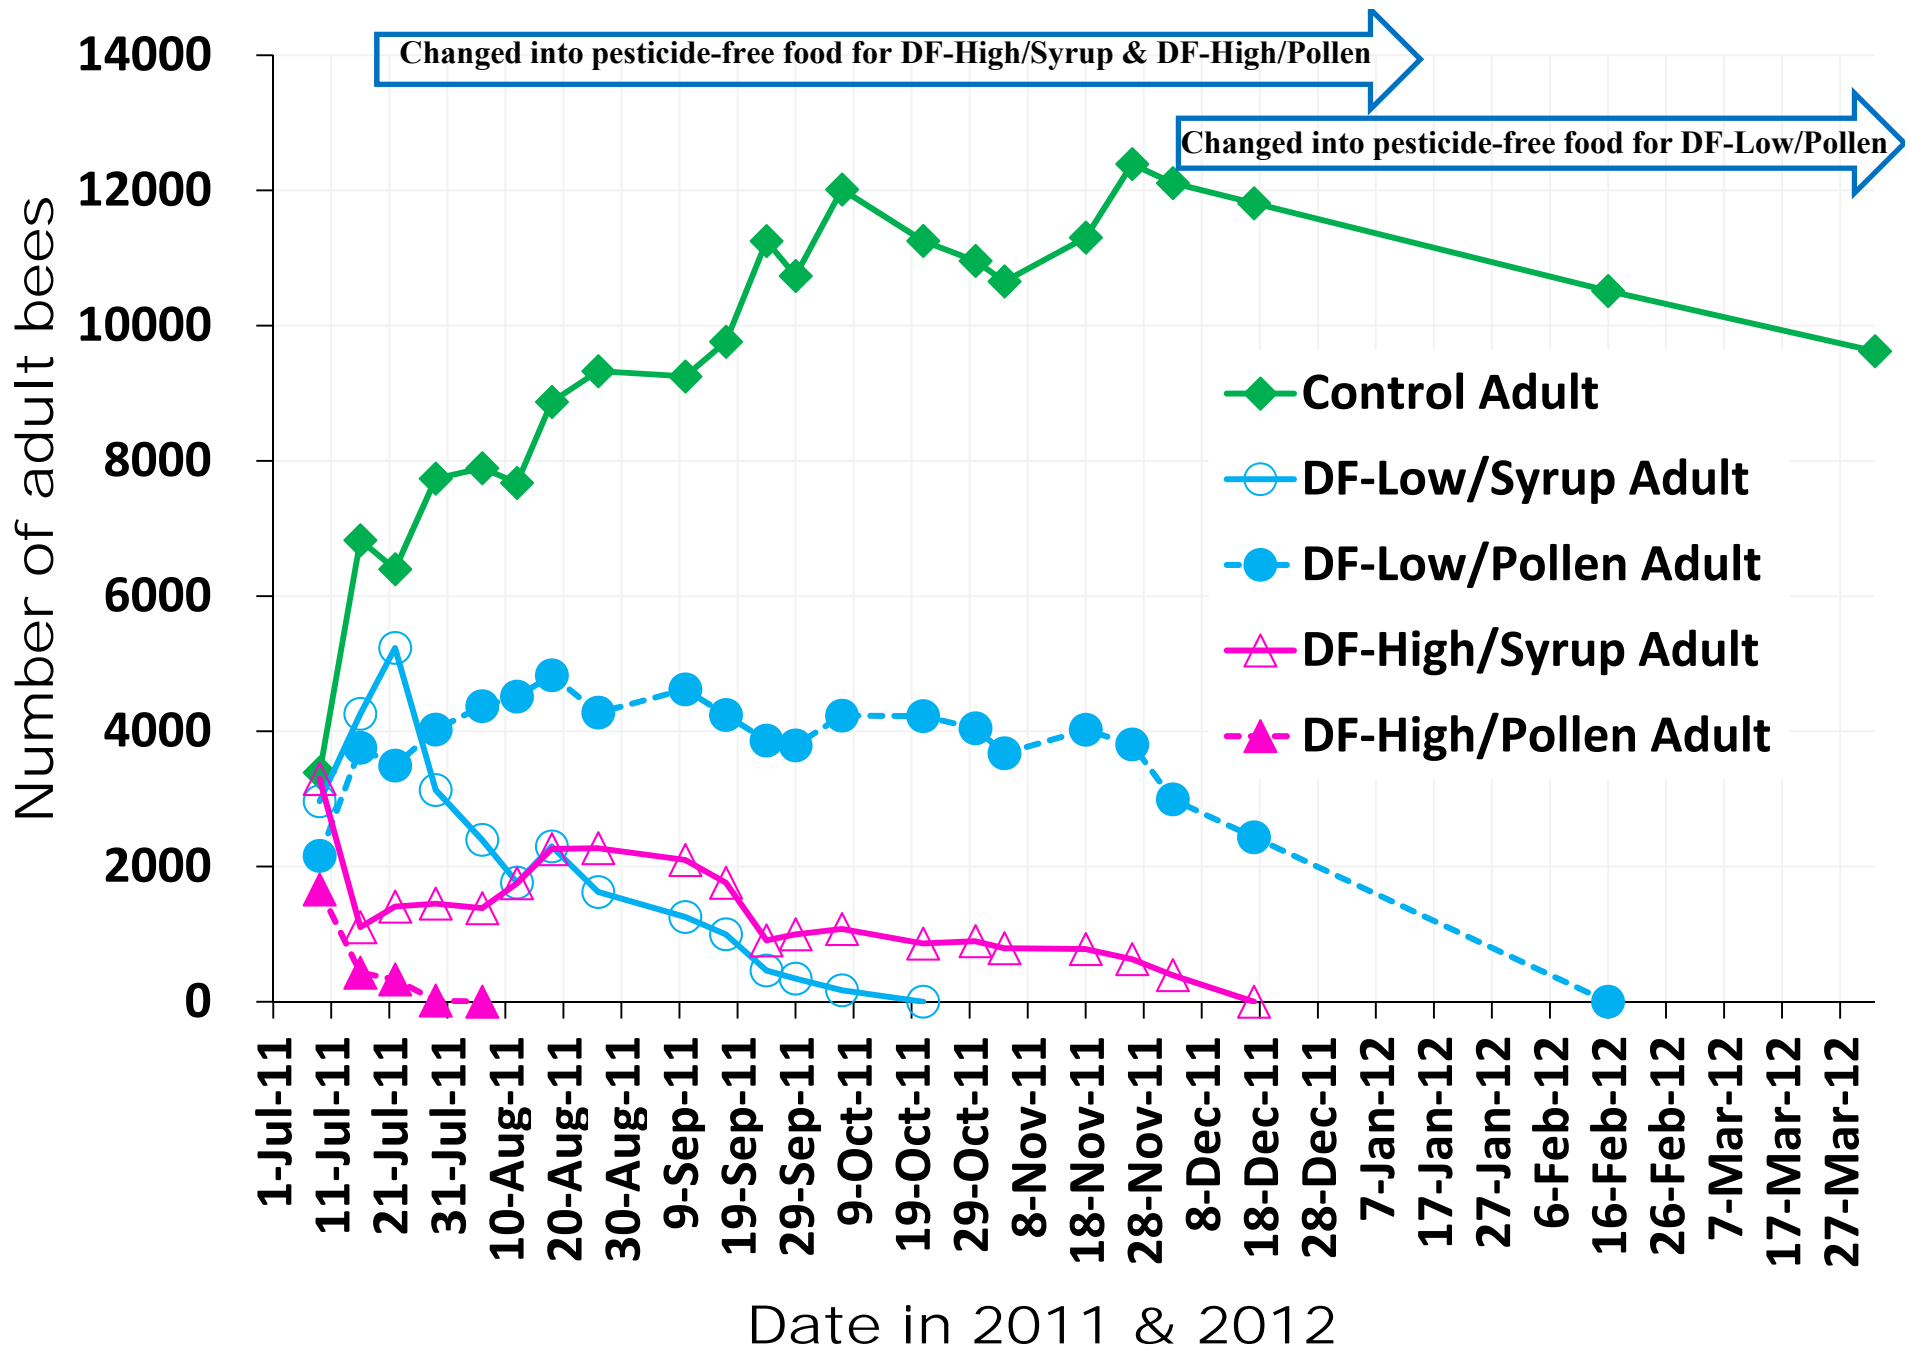

**Figure 1** Change in number of adult bees

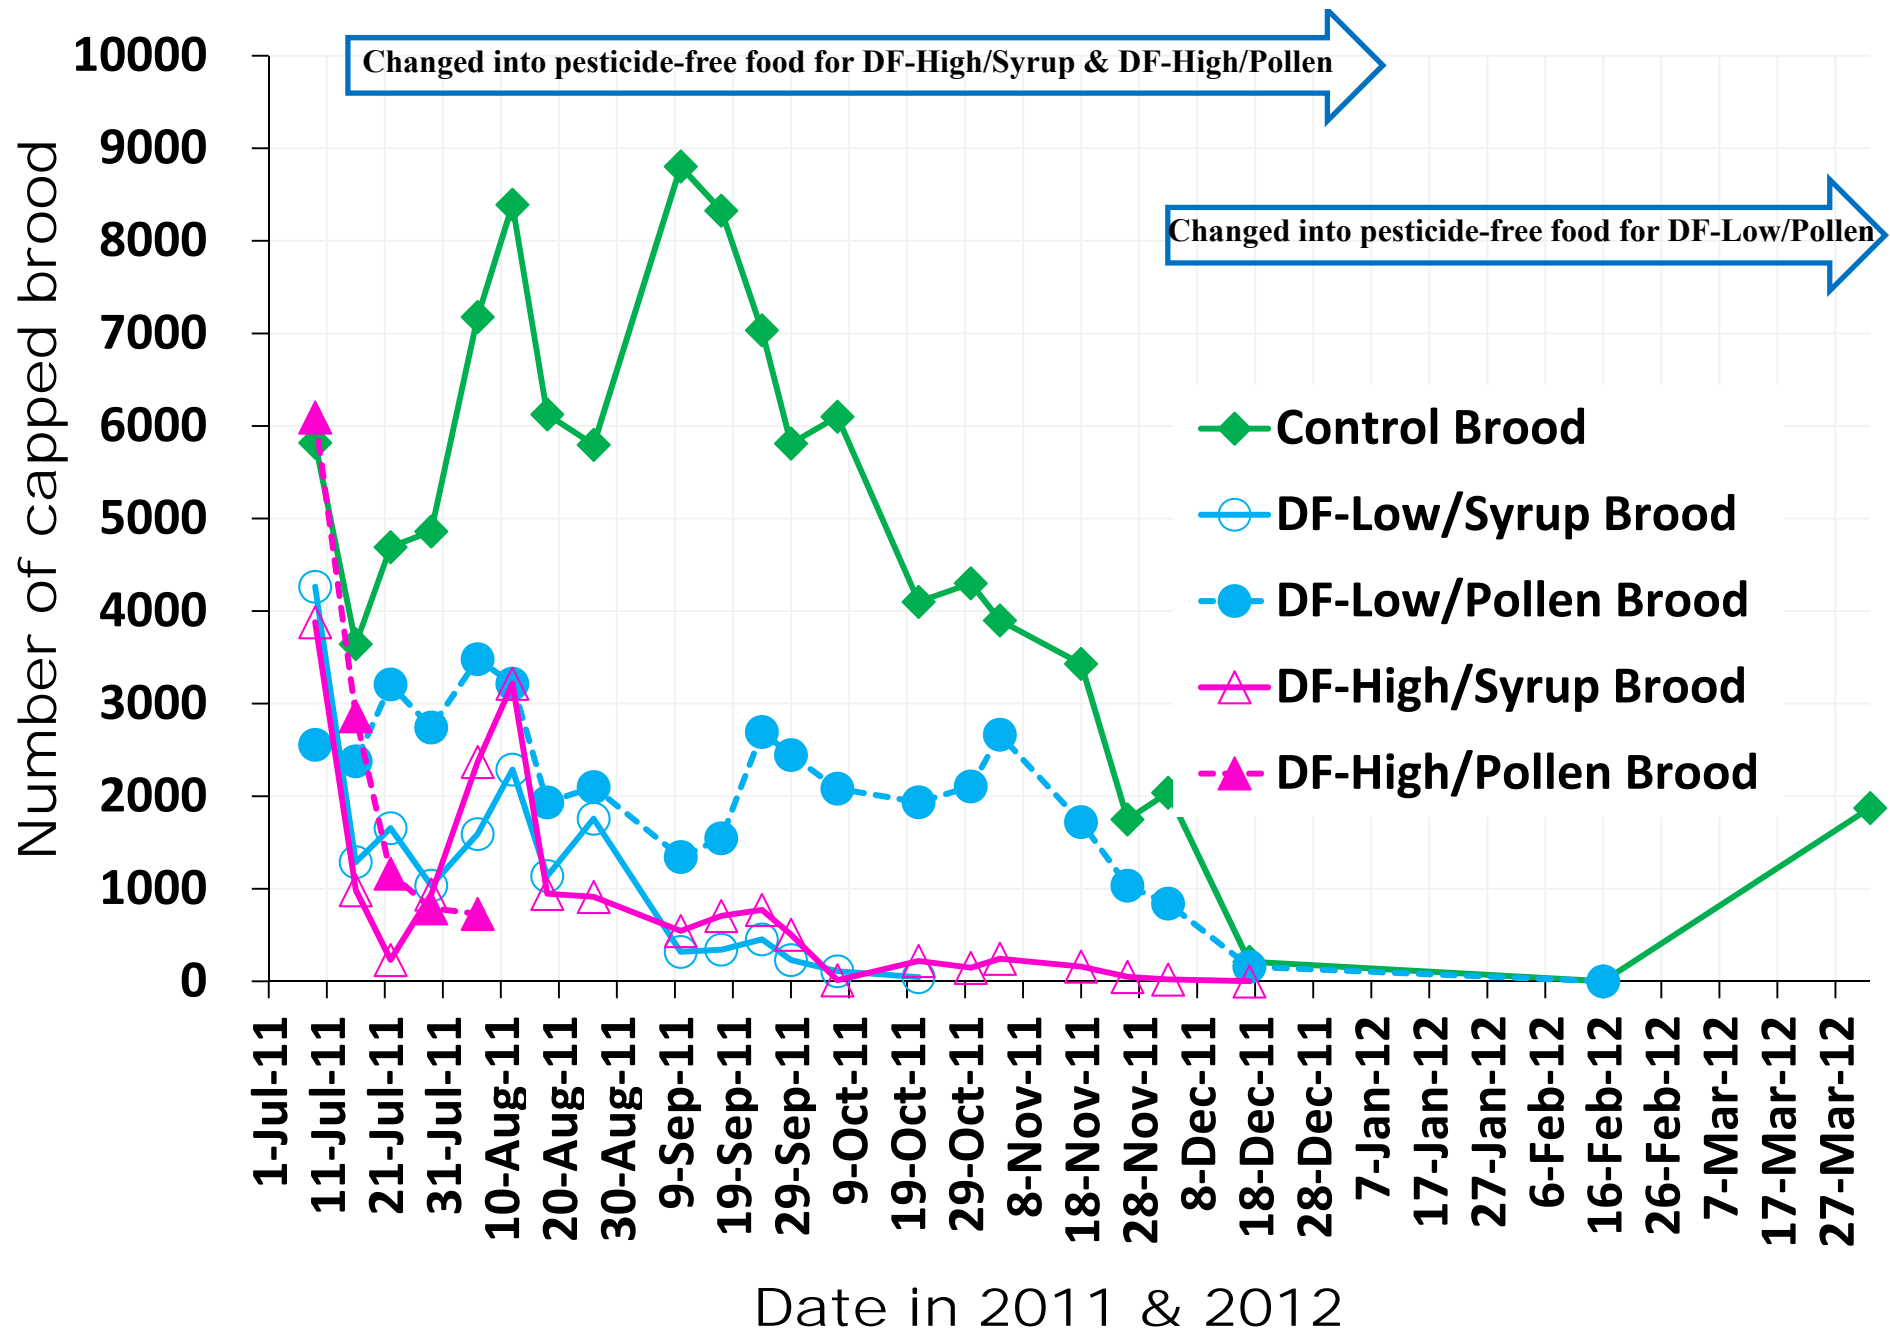

**Figure 2 Change in number of capped brood**

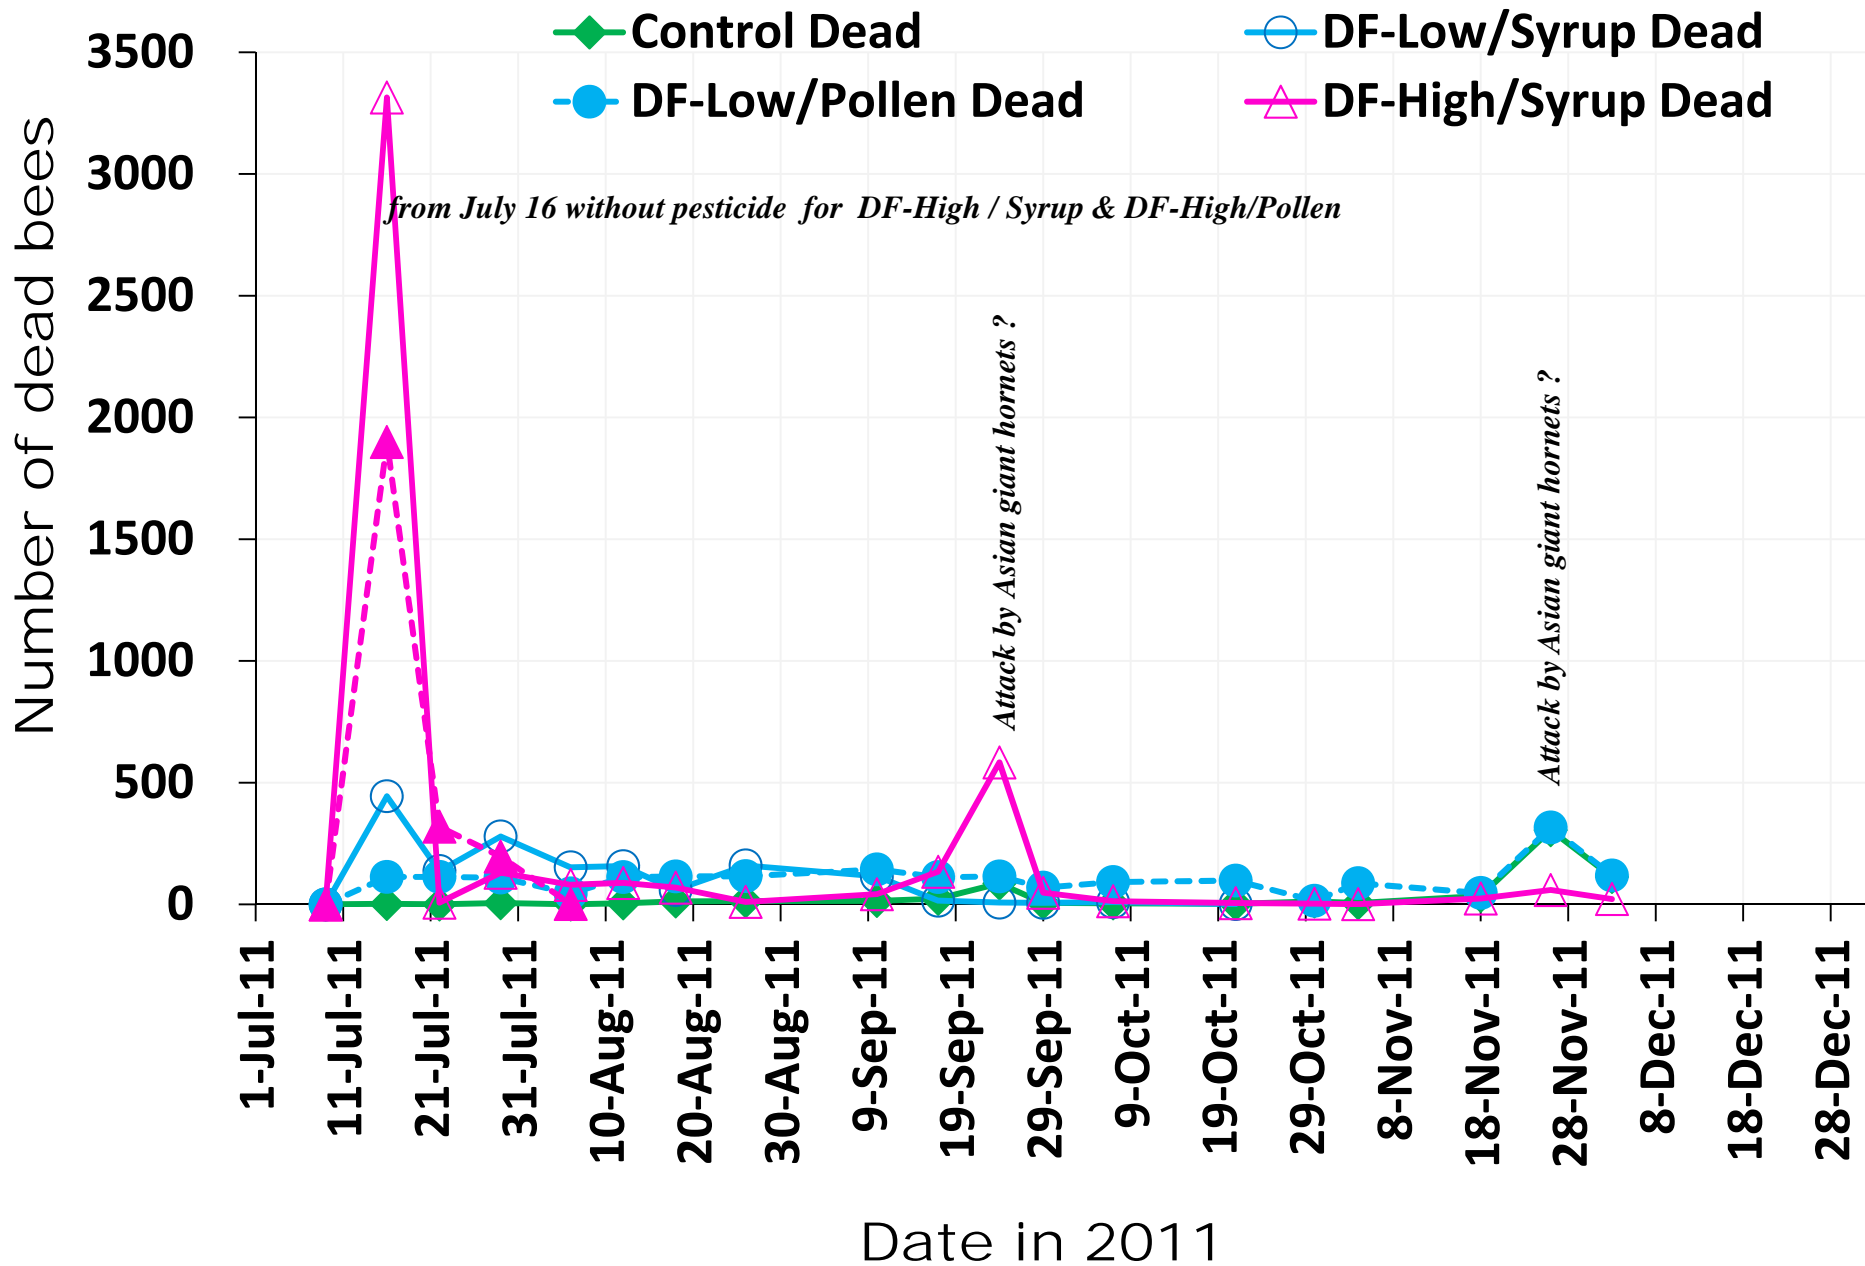

**Figure 3** Change in total number of dead bees inside and outside of a hive

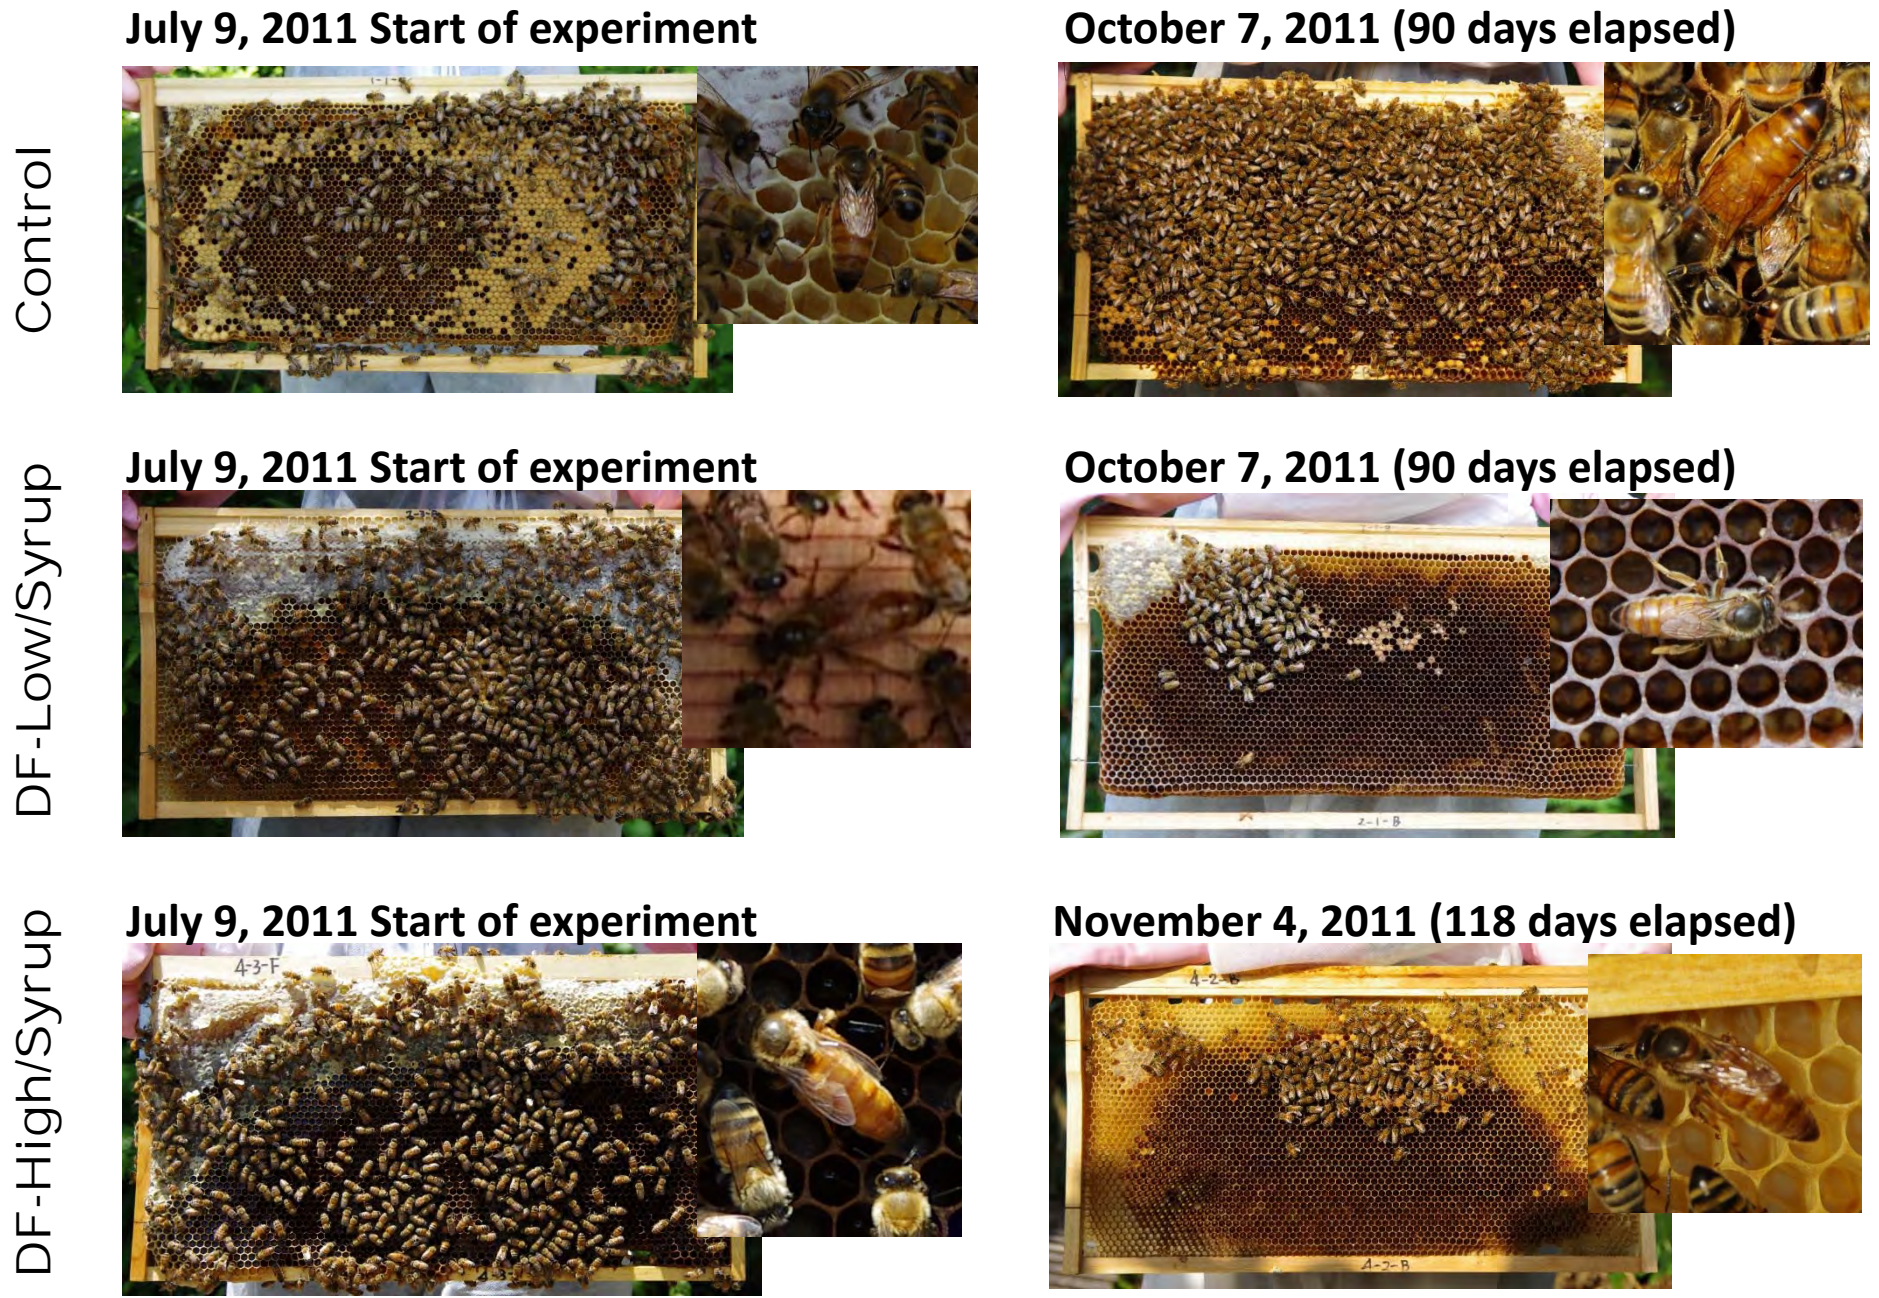

**Figure 4** Difference in state on comb between at the start of experiment and just before colony extinction

## Start of experiment (July 9 in 2011) for DF-Low/Pollen

Dinotefuran was administered from July 9 in 2011 to December 3

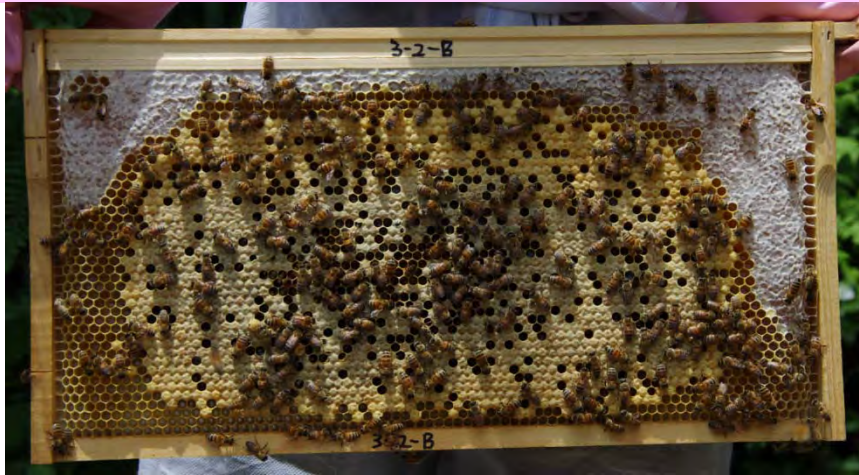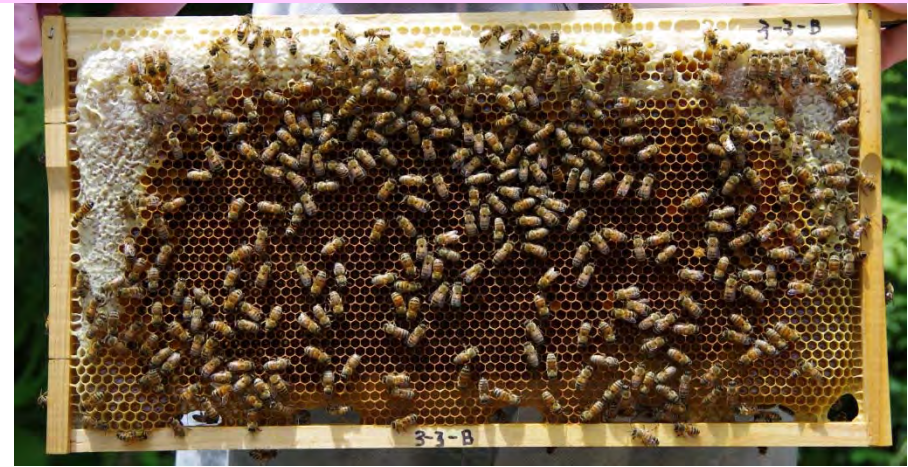

## Just before wintering (December 3 in 2011) for DF-Low/Pollen

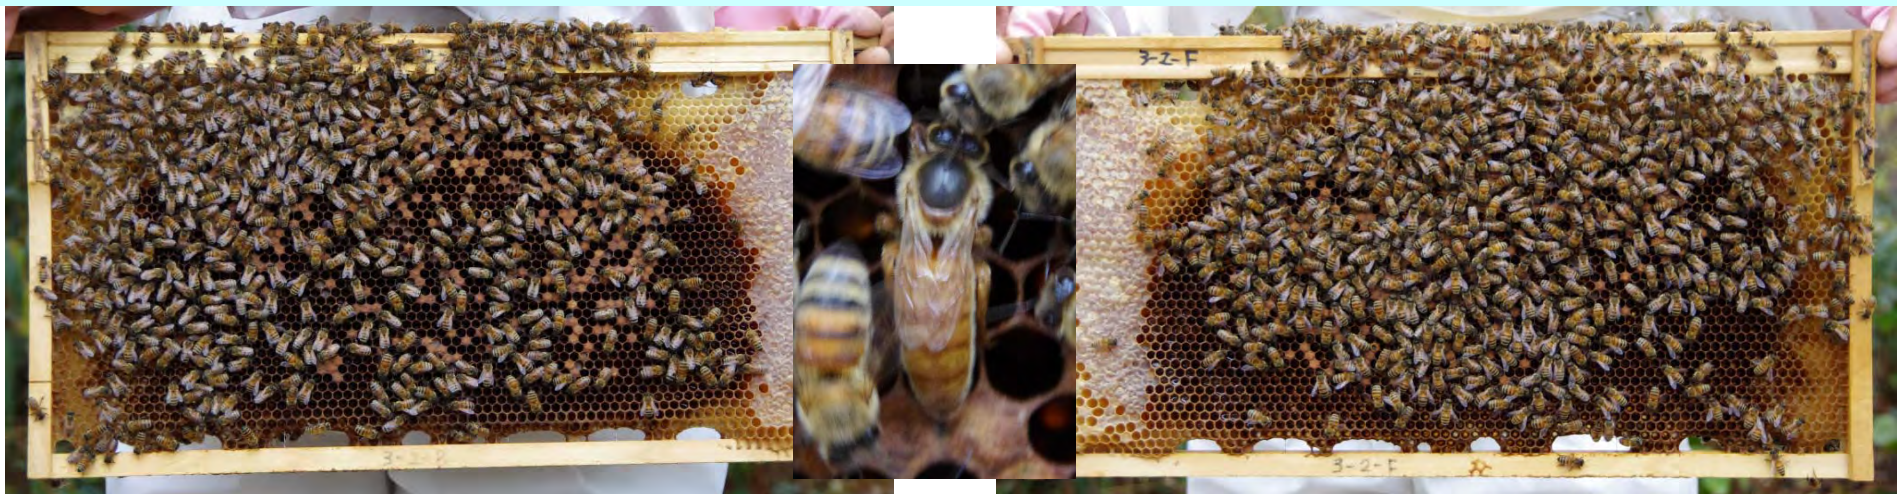

After December 3, no dinotefuran was administered

Figure 5 Comparison of colony between start of experiment and before wintering

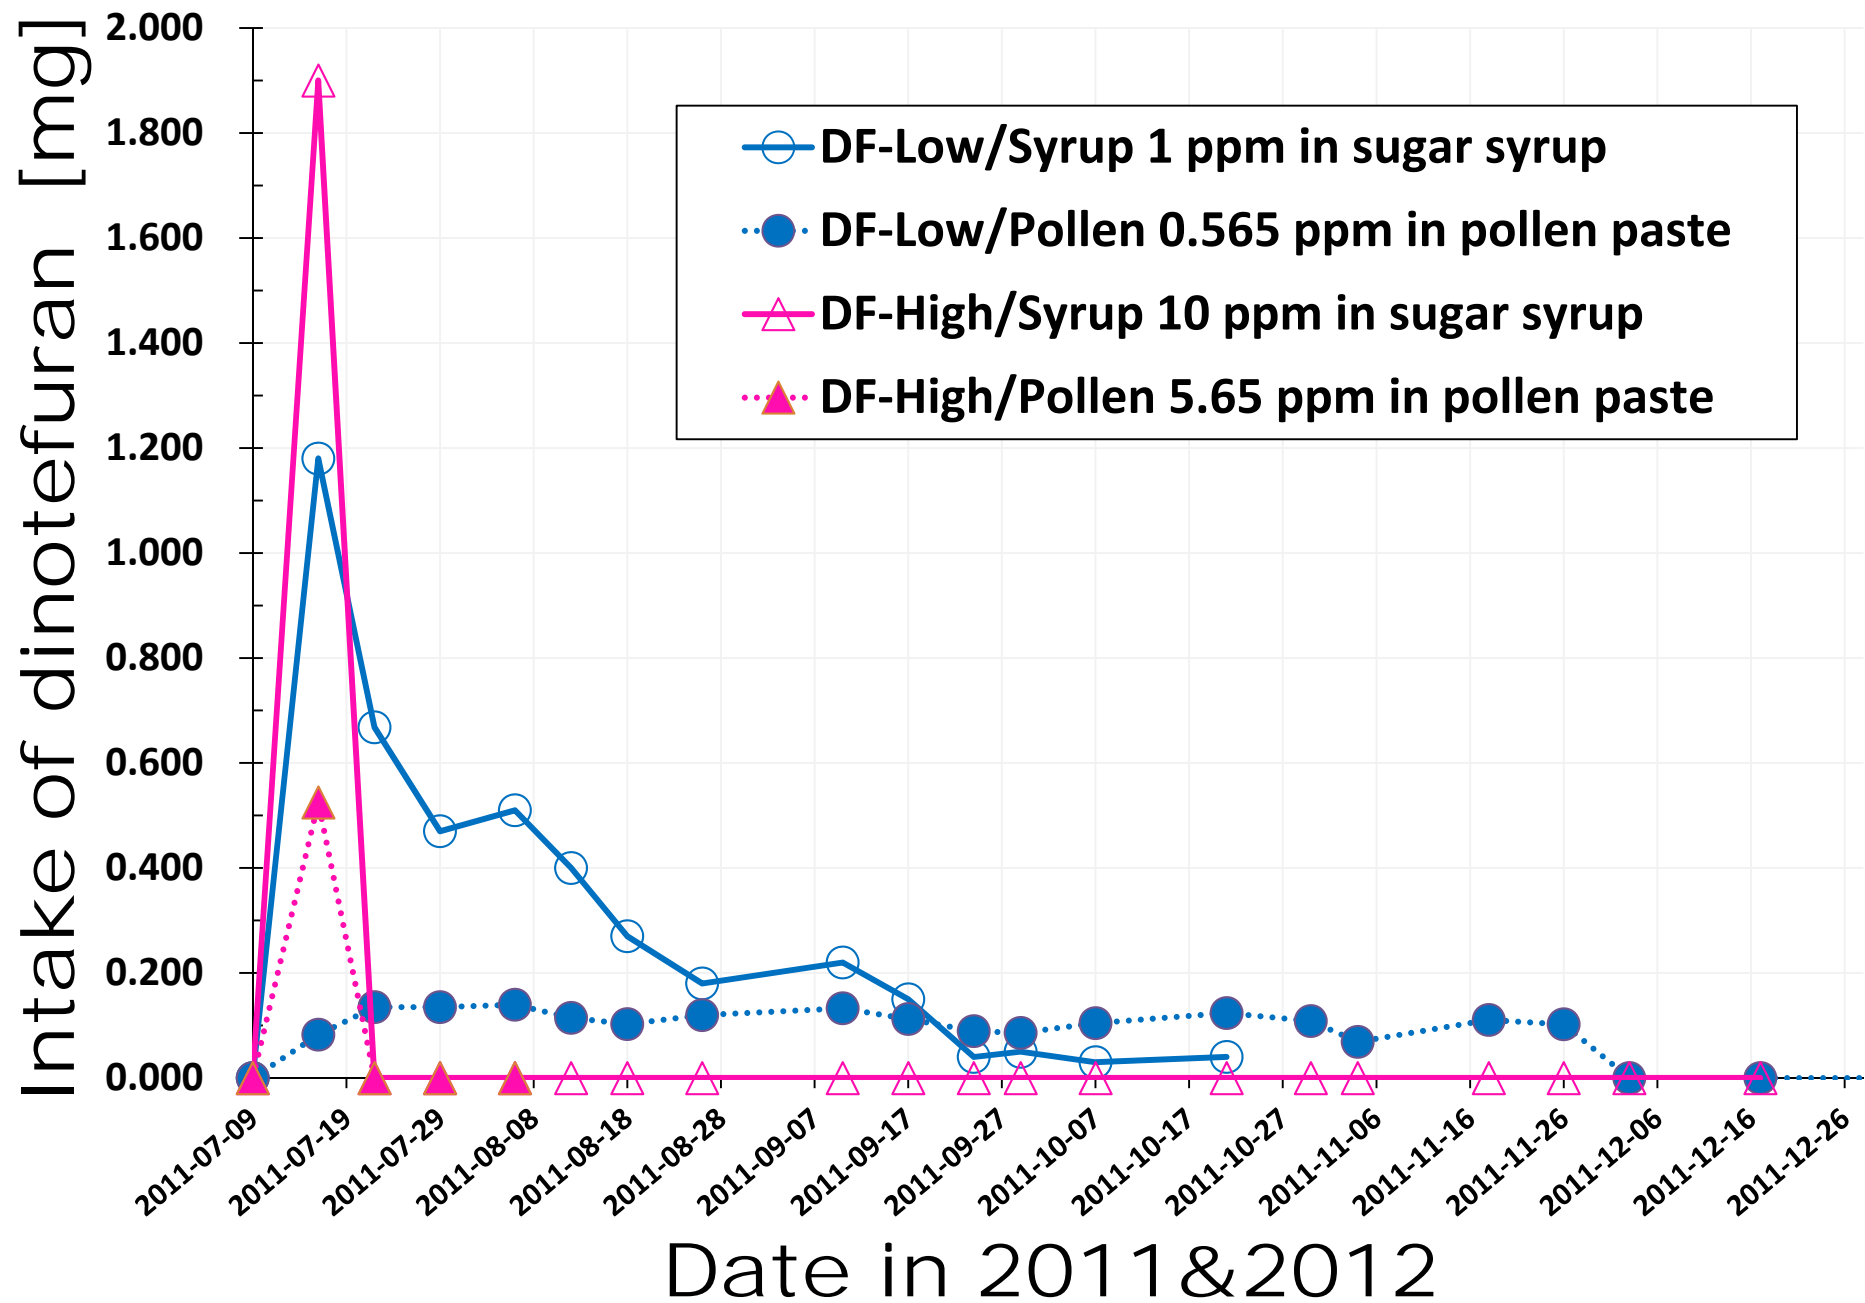

**Figure 6 Change in the intake of dinotefuran**

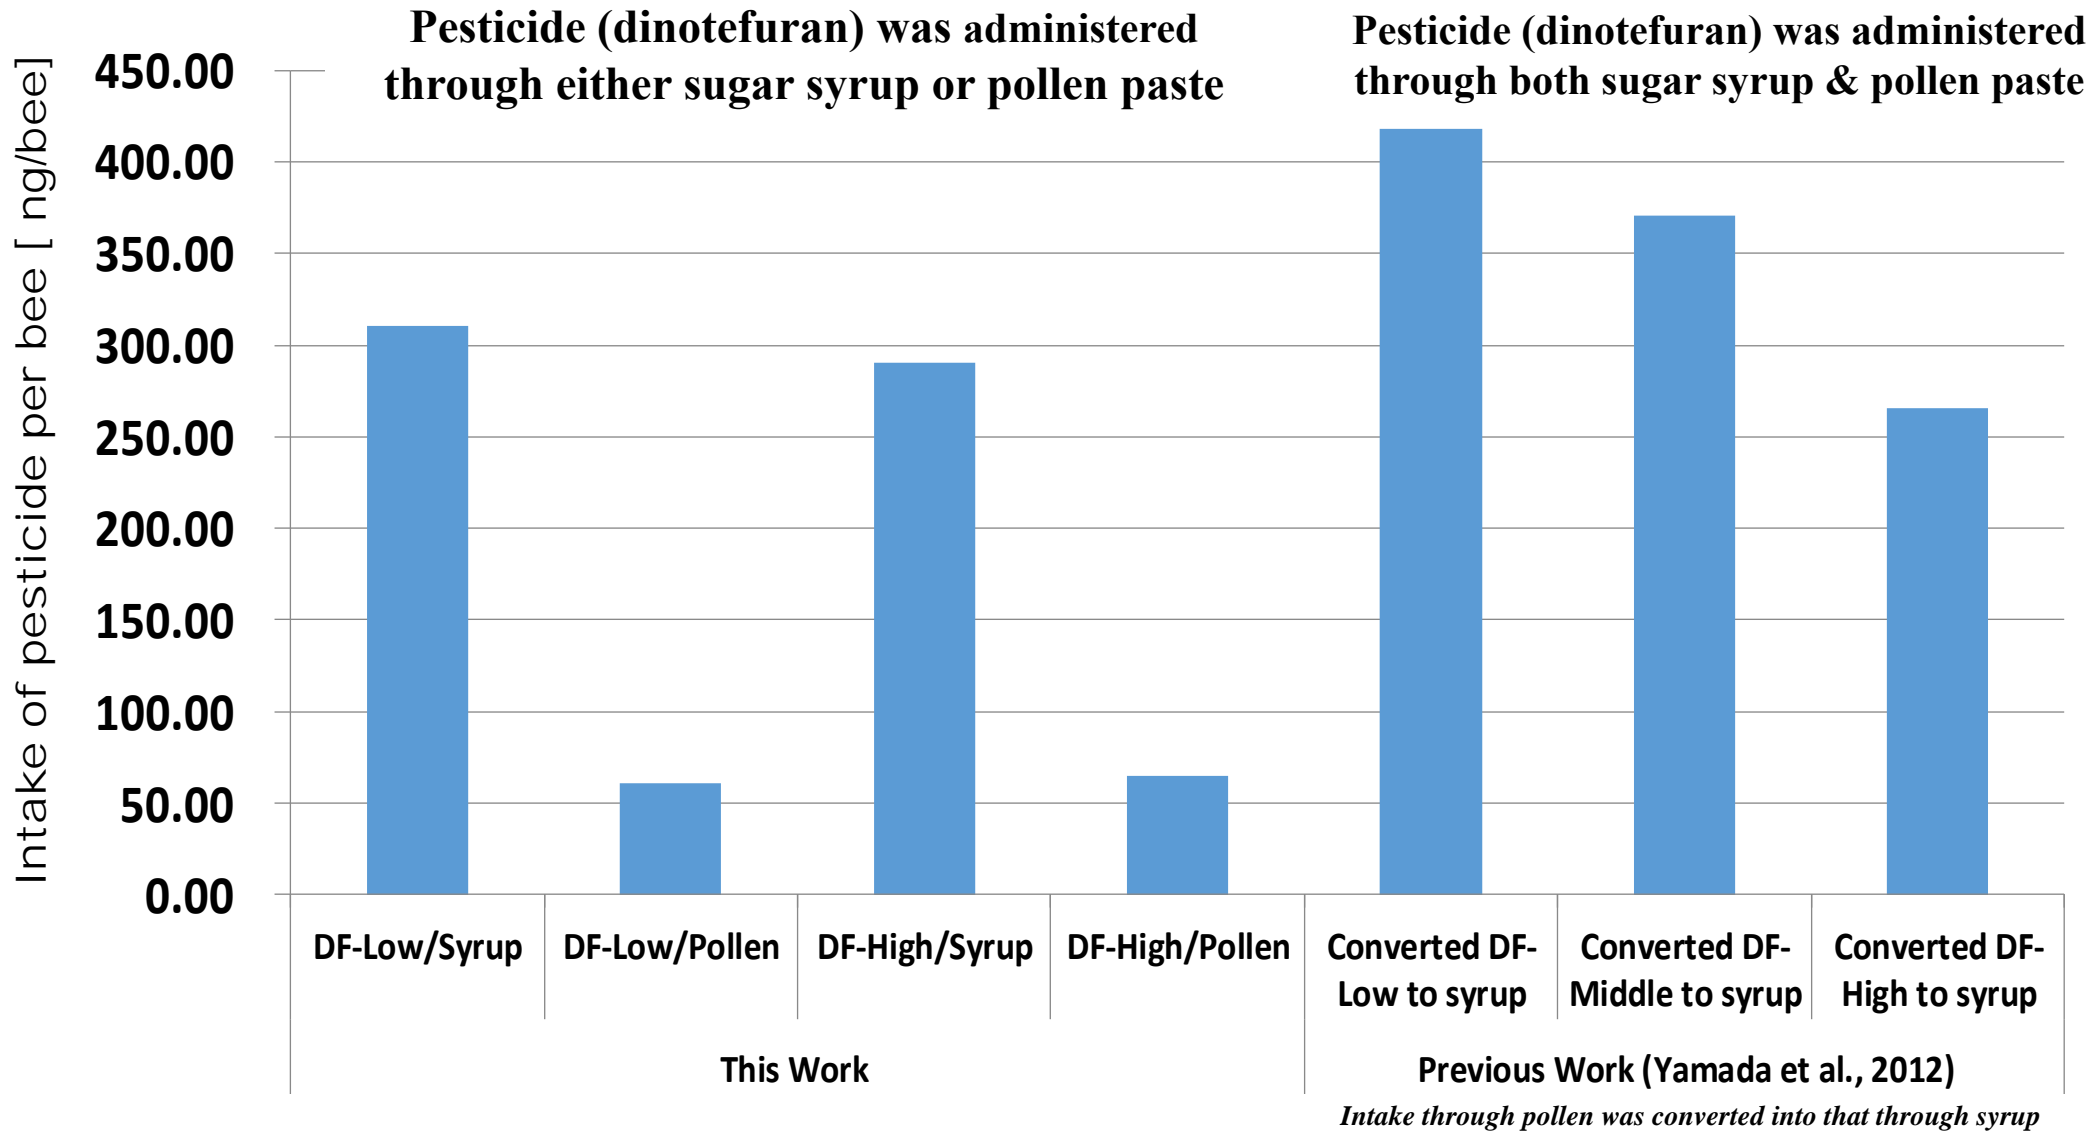

**Figure 7 Total intake of dinotefuran per bee for CASE 1**



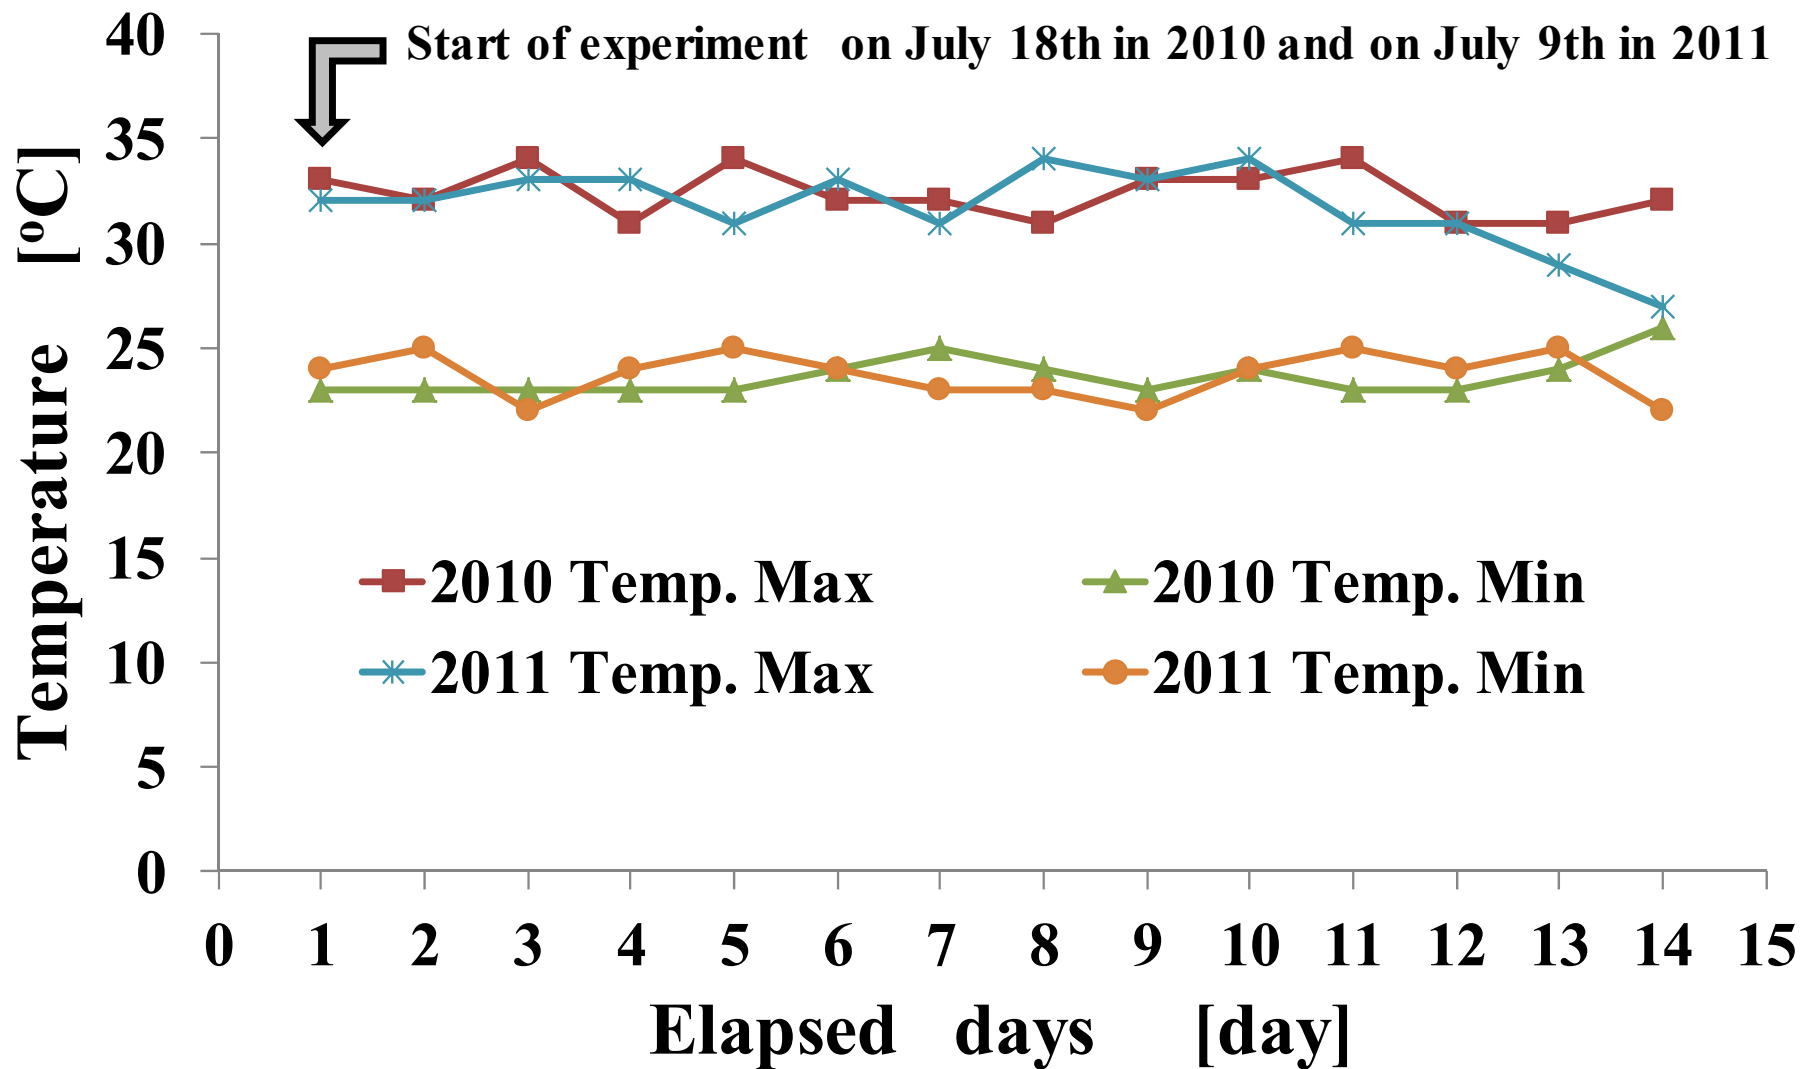

Figure 8 Weather (temp) change in 2010 (previous work) & 2011 (this work)

Table 1 Details of experimental methods in this work

|                                                                                              | <b>Details of Experimental methods</b>                                                                                                                                                                                                                                                                                                                          |
|----------------------------------------------------------------------------------------------|-----------------------------------------------------------------------------------------------------------------------------------------------------------------------------------------------------------------------------------------------------------------------------------------------------------------------------------------------------------------|
| <b>Experimental period</b>                                                                   | July 9 in 2011 to April 2 in 2012                                                                                                                                                                                                                                                                                                                               |
| <b>Circumstances in an apiary</b>                                                            | Without the large paddy field within a radius of two kilometers of the apiary and controllable time and place for crop-dusting                                                                                                                                                                                                                                  |
| <b>Confirmation of experiment</b>                                                            | Double-checked by two persons                                                                                                                                                                                                                                                                                                                                   |
| <b>Number of hives</b>                                                                       | Five hives (one control & four dose tests)                                                                                                                                                                                                                                                                                                                      |
| <b>Initial composition of a hive</b>                                                         | three combs & a feeder                                                                                                                                                                                                                                                                                                                                          |
| <b>Initial number of honeybees</b>                                                           | ca. 3,000                                                                                                                                                                                                                                                                                                                                                       |
| <b>Record of colony conditions</b>                                                           | Photos of all combs and the inside of a hive with honeybees and all combs without honeybees taken in every experiment                                                                                                                                                                                                                                           |
| <b>Record of entrance circumstance</b>                                                       | Time-lapse photography at the interval of 1 hour with two cameras                                                                                                                                                                                                                                                                                               |
| <b>Number of adult bees in a hive</b>                                                        | Directly counted with a counter on photos of all combs and the inside of a hive one by one                                                                                                                                                                                                                                                                      |
| <b>Number of brood in a hive</b>                                                             | Directly counted with a counter on photos of all combs without honeybees                                                                                                                                                                                                                                                                                        |
| <b>Number of dead bees</b>                                                                   | Directly counted one by one with distinguishing between dead bees in a hive and those on the tray installed under a hive                                                                                                                                                                                                                                        |
| <b>Intake of pesticide of honeybees</b>                                                      | Accurately weighed by a weighing instrument                                                                                                                                                                                                                                                                                                                     |
| <b>A kind of pesticide</b>                                                                   | Dinotefuran (DF) which is the top amount of pesticide used in Japan                                                                                                                                                                                                                                                                                             |
| <b>Concentration of pesticide administered into a colony via sugar syrup or pollen paste</b> | 1 (DF-Low) and 10 ppm (DF-High) of DF in sugar syrup. As pollen paste is made of sugar syrup and pure pollen in a ratio of 1.3:1 after pulverizing pollen into finer particles, the concentration of pesticide in pollen paste becomes 0.565 ppm for DF-Low/Pollen and 5.65 ppm for DF-High/Pollen. Sugar syrup was made of an equal amount of sugar and water. |
| <b>Administration method of pesticide</b>                                                    | 1) Separate administration of either sugar syrup or pollen paste with pesticide in each hive<br>2) For DF-High, the pesticide was administered only in the beginning of experiment (that is, the period of administration was seven days) and for the others, it continued to be administered during the experimental period till the colony become extinct     |
| <b>Prevention of swarming</b>                                                                | Experiment start after the swarming period and then addition of a new comb and change to a bigger hive                                                                                                                                                                                                                                                          |
| <b>Confirmation of a queen bee</b>                                                           | Record by photos                                                                                                                                                                                                                                                                                                                                                |
| <b>Flowering site</b>                                                                        | Flowering site was installed in the apiary such as the fields of leaf mustard <i>Brassica juncea</i> and hairy vetch <i>Vicia villosa</i> .                                                                                                                                                                                                                     |
| <b>Honeybee watering place</b>                                                               | New watering place was provided for honeybees in the apiary                                                                                                                                                                                                                                                                                                     |
| <b>Hornet catcher</b>                                                                        | Installation of a hornet catcher in each hive after summer                                                                                                                                                                                                                                                                                                      |
| <b>Starting time of each experiment</b>                                                      | Early morning if possible                                                                                                                                                                                                                                                                                                                                       |
| <b>Others</b>                                                                                | Record by photos about troubles such as wax worms, bee-beetles, etc                                                                                                                                                                                                                                                                                             |

Table 2 Memorandum of observational results in this work

| Date      | Days | Control |                                                                             | DF-Low/Syrup |                                                                                                           | DF-Low/Pollen |                                                                                                                                                  | DF-High/Syrup |                                                                                                                     | DF-High/Pollen |                                                                                                                                         |
|-----------|------|---------|-----------------------------------------------------------------------------|--------------|-----------------------------------------------------------------------------------------------------------|---------------|--------------------------------------------------------------------------------------------------------------------------------------------------|---------------|---------------------------------------------------------------------------------------------------------------------|----------------|-----------------------------------------------------------------------------------------------------------------------------------------|
|           |      | Combs   | Note                                                                        | Combs        | Note                                                                                                      | Combs         | Note                                                                                                                                             | Combs         | Note                                                                                                                | Combs          | Note                                                                                                                                    |
| 9-Jul-11  | 0    | 3       | No dead bees: No mites                                                      | 3            | No dead bees: No mites                                                                                    | 3             | No dead bees: No mites                                                                                                                           | 3             | No dead bees: No mites                                                                                              | 3              | No dead bees: No mites                                                                                                                  |
| 10-Jul-11 | 0    | 3       | Without the check in the inside of hive<br>No dead bees                     | 3            | Without the check in the inside of hive<br>No dead bees                                                   | 3             | Without the check in the inside of hive<br>No dead bees                                                                                          | 3             | Without the check in the inside of hive<br>Many dead bees around the hive (only by the appearance without counting) | 3              | Without the check in the inside of hive<br>Many dead bees around the hive (only by the appearance without counting)                     |
| 16-Jul-11 | 7    | 3       | 2 dead bees: No mites                                                       | 3            | 444 dead bees: No mites                                                                                   | 3             | 113 dead bees: No mites                                                                                                                          | 3             | Stop of the pesticide administration<br>Many (3314) dead bees around and inside the hive: A few mites               | 3              | Stop of the pesticide administration<br>Many (1899) dead bees around and inside the hive: No mites<br>Queen-loss (she died in the hive) |
| 22-Jul-11 | 13   | 4       | Addition of a comb: No dead bees<br>No mites                                | 3            | 137 dead bees: No mites                                                                                   | 3             | 113 dead bees: No mites                                                                                                                          | 3             | 7 dead bees: No mites                                                                                               | 3              | 319 dead bees: No mites                                                                                                                 |
| 29-Jul-11 | 20   | 5       | Addition of a comb: 5 dead bees<br>No mites                                 | 3            | 279 dead bees: No mites                                                                                   | 3             | 110 dead bees: No mites                                                                                                                          | 3             | 130 dead bees: No mites                                                                                             | 3              | 196 dead bees: 3 mites<br>1 wax-moth larvae                                                                                             |
| 6-Aug-11  | 28   | 5       | No dead bees: No mites                                                      | 3            | 152 dead bees: No mites                                                                                   | 3             | 45 dead bees                                                                                                                                     | 3             | 80 dead bees: No mites                                                                                              | 3              | Termination of the experiment<br>2 dead bees: No mites:<br>1 wax-mph larva: Stock of foods                                              |
| 12-Aug-11 | 34   | 6       | Addition of a comb: Installation of a hornet-capture: 4 dead bees: No mites | 3            | Installation of a hornet-capture<br>157 dead bees: No mites                                               | 3             | Installation of a hornet-capture<br>112 dead bees: No mites                                                                                      | 3             | Installation of a hornet-capture<br>88 dead bees: No mites                                                          |                |                                                                                                                                         |
| 18-Aug-11 | 40   | 6       | 12 dead bees: No mites                                                      | 3            | 59 dead bees: No mites                                                                                    | 3             | 115 dead bees: No mites                                                                                                                          | 3             | 69 dead bees: No mites                                                                                              |                |                                                                                                                                         |
| 26-Aug-11 | 48   | 6       | 13 dead bees: No mites                                                      | 3            | A feeble queen: 160 dead bees<br>No mites                                                                 | 3             | 116 dead bees: No mites                                                                                                                          | 3             | 10 dead bees: No mites                                                                                              |                |                                                                                                                                         |
| 10-Sep-11 | 63   | 6       | 14 dead bees: No mites                                                      | 3            | 115 dead bees: No mites                                                                                   | 3             | 144 dead bees: No mites                                                                                                                          | 3             | 42 dead bees: No mites                                                                                              |                |                                                                                                                                         |
| 17-Sep-11 | 70   | 6       | 23 dead bees: No mites                                                      | 3            | 15 dead bees: No mites                                                                                    | 3             | 112 dead bees: No mites                                                                                                                          | 3             | 134 dead bees: No mites                                                                                             |                |                                                                                                                                         |
| 24-Sep-11 | 77   | 6       | Attack by hornets: 86 dead bees<br>No mites                                 | 3            | Some dead brood: 7 dead bees<br>No mites                                                                  | 3             | 115 dead bees: No mites                                                                                                                          | 3             | Attack by hornets: 583 dead bees<br>No mites                                                                        |                |                                                                                                                                         |
| 29-Sep-11 | 82   | 6       | 6 dead bees: No mites                                                       | 3            | Some dead brood & a few wax-moth larvae larvae : 6 dead bees: No mites                                    | 3             | 69 dead bees: No mites                                                                                                                           | 3             | 48 dead bees: No mites                                                                                              |                |                                                                                                                                         |
| 7-Oct-11  | 90   | 6       | 4 dead bees: No mites                                                       | 3            | A few wax-moth larvae & some hive beetles: 9 dead bees: No mites                                          | 3             | 92 dead bees: No mites                                                                                                                           | 3             | 13 dead bees: No mites                                                                                              |                |                                                                                                                                         |
| 21-Oct-11 | 104  | 6       | 2 dead bees: No mites                                                       | 3            | Extinction & many wax-moth larvae (Termination of the experiment)<br>1 dead bee: No mites: Stock of foods | 3             | 98 dead bees: No mites                                                                                                                           | 3             | 5 dead bees: No mites                                                                                               |                |                                                                                                                                         |
| 30-Oct-11 | 113  | 6       | 12 dead bees: No mites                                                      |              |                                                                                                           | 3             | 15 dead bees: No mites                                                                                                                           | 3             | 3 dead bees: No mites                                                                                               |                |                                                                                                                                         |
| 4-Nov-11  | 118  | 6       | 5 dead bees: No mites                                                       |              |                                                                                                           | 3             | 87 dead bees: 1 mite                                                                                                                             | 3             | 1 dead bees: No mites                                                                                               |                |                                                                                                                                         |
| 18-Nov-11 | 132  | 6       | 35 dead bees: No mites                                                      |              |                                                                                                           | 3             | 47 dead bees: No mites                                                                                                                           | 3             | Queen-loss: 24 dead bees: No mites                                                                                  |                |                                                                                                                                         |
| 26-Nov-11 | 140  | 6       | 305 dead bees: No mites                                                     |              |                                                                                                           | 3             | Attack by hornets: 316 dead bees<br>No mites                                                                                                     | 3             | 59 dead bees: No mites                                                                                              |                |                                                                                                                                         |
| 3-Dec-11  | 148  | 6       | Attack by hornets: 113 dead bees:<br>No mites                               |              |                                                                                                           | 3             | Attack by hornets: 119 dead bees<br>After the stop of pollen paste with dinotefuran and sugar syrup without dinotefuran kept being fed. No mites | 3             | (Termination of the experiment)<br>22 dead bees: No mites<br>Stock of foods                                         |                |                                                                                                                                         |
| 17-Dec-11 | 162  | 6       | Stop of sugar syrup feeding and start of wintering                          |              |                                                                                                           | 3             | Stop of sugar syrup feeding and start of wintering                                                                                               |               |                                                                                                                     |                |                                                                                                                                         |
| 16-Feb-12 | 223  | 6       | Wintering                                                                   |              |                                                                                                           | 3             | Extinction (Failure in wintering)<br>(Termination of the experiment)<br>Stock of foods                                                           |               |                                                                                                                     |                |                                                                                                                                         |
| 2-Apr-12  | 269  | 6       | Success in wintering: 1 mite                                                |              |                                                                                                           | 3             |                                                                                                                                                  |               |                                                                                                                     |                |                                                                                                                                         |

(Note) Total number of dead bees in the hive at the observational date = Number of dead bees near the hive + Number of dead bees inside the hive

Table 3 The numbers of adult bees, capped brood & dead bees

| Date      | Days | Control pesticide-free |       |      | DF-Low/Syrup 1 ppm of dinotefuran |             |            | DF-Low/Pollen 0.565 ppm of dinotefuran |             |            | DF-High/Syrup 10 ppm of dinotefuran |             |             | DF-High/Pollen 5.65 ppm of dinotefuran |               |               |
|-----------|------|------------------------|-------|------|-----------------------------------|-------------|------------|----------------------------------------|-------------|------------|-------------------------------------|-------------|-------------|----------------------------------------|---------------|---------------|
|           |      | Adult                  | Brood | Dead | Adult                             | Brood       | Dead       | Adult                                  | Brood       | Dead       | Adult                               | Brood       | Dead        | Adult                                  | Brood         | Dead          |
| 9-Jul-11  | 0    | 3392                   | 5819  | 0    | <b>2965</b>                       | <b>4263</b> | <b>0</b>   | <b>2158</b>                            | <b>2556</b> | <b>0</b>   | <b>3295</b>                         | <b>3880</b> | <b>0</b>    | <b>1659</b>                            | <b>6093</b>   | <b>0</b>      |
| 16-Jul-11 | 7    | 6827                   | 3644  | 2    | <b>4257</b>                       | <b>1287</b> | <b>444</b> | <b>3755</b>                            | <b>2377</b> | <b>113</b> | <b>1102</b>                         | <b>986</b>  | <b>3314</b> | <b>[430]</b>                           | <b>[2865]</b> | <b>[1899]</b> |
| 22-Jul-11 | 13   | 6399                   | 4692  | 0    | <b>5233</b>                       | <b>1655</b> | <b>137</b> | <b>3493</b>                            | <b>3207</b> | <b>113</b> | 1407                                | 232         | 7           | [330]                                  | [1165]        | [319]         |
| 29-Jul-11 | 20   | 7737                   | 4861  | 5    | <b>3131</b>                       | <b>1034</b> | <b>279</b> | <b>4025</b>                            | <b>2743</b> | <b>110</b> | 1451                                | 939         | 130         | [17]                                   | [790]         | [196]         |
| 6-Aug-11  | 28   | 7893                   | 7179  | 0    | <b>2393</b>                       | <b>1591</b> | <b>152</b> | <b>4372</b>                            | <b>3480</b> | <b>45</b>  | 1384                                | 2370        | 80          | [1]                                    | [729]         | [2]           |
| 12-Aug-11 | 34   | 7675                   | 8390  | 4    | <b>1762</b>                       | <b>2288</b> | <b>157</b> | <b>4513</b>                            | <b>3217</b> | <b>112</b> | 1752                                | 3217        | 88          |                                        |               |               |
| 18-Aug-11 | 40   | 8873                   | 6125  | 12   | <b>2298</b>                       | <b>1137</b> | <b>59</b>  | <b>4829</b>                            | <b>1933</b> | <b>115</b> | 2257                                | 946         | 69          |                                        |               |               |
| 26-Aug-11 | 48   | 9327                   | 5797  | 13   | <b>1623</b>                       | <b>1757</b> | <b>160</b> | <b>4276</b>                            | <b>2099</b> | <b>116</b> | 2271                                | 913         | 10          |                                        |               |               |
| 10-Sep-11 | 63   | 9249                   | 8803  | 14   | <b>1253</b>                       | <b>318</b>  | <b>115</b> | <b>4620</b>                            | <b>1343</b> | <b>144</b> | 2096                                | 545         | 42          |                                        |               |               |
| 17-Sep-11 | 70   | 9762                   | 8327  | 23   | <b>997</b>                        | <b>341</b>  | <b>15</b>  | <b>4241</b>                            | <b>1546</b> | <b>112</b> | 1760                                | 707         | 134         |                                        |               |               |
| 24-Sep-11 | 77   | 11252                  | 7034  | 86   | <b>462</b>                        | <b>453</b>  | <b>7</b>   | <b>3862</b>                            | <b>2693</b> | <b>115</b> | 908                                 | 772         | 583         |                                        |               |               |
| 29-Sep-11 | 82   | 10736                  | 5810  | 6    | <b>342</b>                        | <b>230</b>  | <b>6</b>   | <b>3792</b>                            | <b>2445</b> | <b>69</b>  | 996                                 | 505         | 48          |                                        |               |               |
| 7-Oct-11  | 90   | 12015                  | 6100  | 4    | <b>169</b>                        | <b>109</b>  | <b>9</b>   | <b>4232</b>                            | <b>2082</b> | <b>92</b>  | 1076                                | 12          | 13          |                                        |               |               |
| 21-Oct-11 | 104  | 11253                  | 4100  | 2    | <b>[0]</b>                        | <b>[45]</b> | <b>[1]</b> | <b>4225</b>                            | <b>1935</b> | <b>98</b>  | 860                                 | 220         | 5           |                                        |               |               |
| 30-Oct-11 | 113  | 10958                  | 4300  | 12   |                                   |             |            | <b>4044</b>                            | <b>2105</b> | <b>15</b>  | 895                                 | 147         | 3           |                                        |               |               |
| 4-Nov-11  | 118  | 10654                  | 3900  | 5    |                                   |             |            | <b>3675</b>                            | <b>2665</b> | <b>87</b>  | 790                                 | 245         | 1           |                                        |               |               |
| 18-Nov-11 | 132  | 11303                  | 3430  | 35   |                                   |             |            | <b>4022</b>                            | <b>1720</b> | <b>47</b>  | [779]                               | [160]       | [24]        |                                        |               |               |
| 26-Nov-11 | 140  | 12390                  | 1750  | 305  |                                   |             |            | <b>3806</b>                            | <b>1034</b> | <b>316</b> | [630]                               | [48]        | [59]        |                                        |               |               |
| 3-Dec-11  | 148  | 12109                  | 2038  | 113  |                                   |             |            | <b>2992</b>                            | <b>840</b>  | <b>119</b> | [393]                               | [21]        | [22]        |                                        |               |               |
| 17-Dec-11 | 162  | 11811                  | 212   |      |                                   |             |            | 2433                                   | 157         |            | [0]                                 | [0]         |             |                                        |               |               |
| 16-Feb-12 | 223  | 10514                  | 0     |      |                                   |             |            | [0]                                    | [0]         |            |                                     |             |             |                                        |               |               |
| 2-Apr-12  | 269  | 9622                   | 1873  |      |                                   |             |            |                                        |             |            |                                     |             |             |                                        |               |               |

Total number of dead bees at each observation date = Number of dead bees near the hive + Number of dead bees inside the hive

The "**bold red**" figures denote a state that foods (sugar syrup, pollen paste) with a pesticide (dinotefuran) were fed into a colony and the "Times New Roman" ones denote pesticide-free foods. Foods with a pesticide were changed to pesticide-free ones in the morning of measurement date: E.g., in DF-High/Syrup and DF-High/Pollen, the change was made in the morning of July 16th. The [bracketed figures] denote a state that the queen had been lost.

Table 4 Change in the intakes of foods (sugar syrup, pollen paste) and pesticide (dinotefuran) taken from foods

| Date      | Elapsed days | Control                        |            |                  |            | DF-Low/Syrup                        |            |                  |            |                  | DF-Low/Pollen                            |          |                  |          |                  | DF-High/Syrup                        |            |                  |            |                  | DF-High/Pollen                          |          |                  |          |                  |                 |            |                  |            |
|-----------|--------------|--------------------------------|------------|------------------|------------|-------------------------------------|------------|------------------|------------|------------------|------------------------------------------|----------|------------------|----------|------------------|--------------------------------------|------------|------------------|------------|------------------|-----------------------------------------|----------|------------------|----------|------------------|-----------------|------------|------------------|------------|
|           |              | Pesticide (dinotefuran) - free |            |                  |            | 1 ppm of dinotefuran in sugar syrup |            |                  |            |                  | 0.565 ppm of dinotefuran in pollen paste |          |                  |          |                  | 10 ppm of dinotefuran in sugar syrup |            |                  |            |                  | 5.65 ppm of dinotefuran in pollen paste |          |                  |          |                  |                 |            |                  |            |
|           |              | Amount of consumption          |            |                  |            | Amount of consumption               |            |                  |            |                  | Amount of consumption                    |          |                  |          |                  | Amount of consumption                |            |                  |            |                  | Amount of consumption                   |          |                  |          |                  |                 |            |                  |            |
|           |              | Sugar syrup [g]                |            | Pollen paste [g] |            | Sugar syrup [g]                     |            | Pollen paste [g] |            | Dinotefuran [mg] | Sugar syrup [g]                          |          | Pollen paste [g] |          | Dinotefuran [mg] | Sugar syrup [g]                      |            | Pollen paste [g] |            | Dinotefuran [mg] | Sugar syrup [g]                         |          | Pollen paste [g] |          | Dinotefuran [mg] | Sugar syrup [g] |            | Pollen paste [g] |            |
| Interval  | Integrated   | Interval                       | Integrated | Interval         | Integrated | Interval                            | Integrated | Interval         | Integrated | Interval         | Integrated                               | Interval | Integrated       | Interval | Integrated       | Interval                             | Integrated | Interval         | Integrated | Interval         | Integrated                              | Interval | Integrated       | Interval | Integrated       | Interval        | Integrated | Interval         | Integrated |
| 9-Jul-11  | 0            | 0                              | 0          | 0                | 0          | 0                                   | 0          | 0                | 0          | 0.000            | 0.000                                    | 0        | 0                | 0        | 0                | 0.0000                               | 0.0000     | 0                | 0          | 0                | 0                                       | 0.000    | 0.000            | 0        | 0                | 0               | 0          | 0.000            | 0.000      |
| 16-Jul-11 | 7            | 1500                           | 1500       | 250              | 250        | 1180                                | 1180       | 180              | 180        | 1.180            | 1.180                                    | 1222     | 1222             | 146      | 146              | 0.0825                               | 0.0825     | 190              | 190        | 161              | 161                                     | 1.900    | 1.900            | [90]     | [90]             | [93]            | [93]       | [0.525]          | [0.525]    |
| 22-Jul-11 | 13           | 1500                           | 3000       | 250              | 500        | 668                                 | 1848       | 165              | 345        | 0.668            | 1.848                                    | 1020     | 2242             | 239      | 385              | 0.1350                               | 0.2175     | 90               | 280        | 113              | 274                                     | 0.000    | 1.900            | [220]    | [310]            | [87]            | [180]      | [0]              | [0.525]    |
| 29-Jul-11 | 20           | 1500                           | 4500       | 250              | 750        | 470                                 | 2318       | 194              | 539        | 0.470            | 2.318                                    | 1270     | 3512             | 239      | 624              | 0.1350                               | 0.3525     | 1010             | 1290       | 164              | 438                                     | 0.000    | 1.900            | [820]    | [1130]           | [53]            | [233]      | [0]              | [0.525]    |
| 6-Aug-11  | 28           | 1500                           | 6000       | 216              | 966        | 510                                 | 2828       | 206              | 745        | 0.510            | 2.828                                    | 1500     | 5012             | 247      | 871              | 0.1396                               | 0.4921     | 370              | 1660       | 158              | 596                                     | 0.000    | 1.900            | [0]      | [1130]           | [0]             | [233]      | [0]              | [0.525]    |
| 12-Aug-11 | 34           | 1500                           | 7500       | 215              | 1181       | 400                                 | 3228       | 144              | 889        | 0.400            | 3.228                                    | 810      | 5822             | 203      | 1074             | 0.1147                               | 0.6068     | 220              | 1880       | 143              | 739                                     | 0.000    | 1.900            |          |                  |                 |            |                  |            |
| 18-Aug-11 | 40           | 1500                           | 9000       | 224              | 1405       | 270                                 | 3498       | 122              | 1011       | 0.270            | 3.498                                    | 1000     | 6822             | 182      | 1256             | 0.1028                               | 0.7096     | 170              | 2050       | 105              | 844                                     | 0.000    | 1.900            |          |                  |                 |            |                  |            |
| 26-Aug-11 | 48           | 1500                           | 10500      | 248              | 1653       | 180                                 | 3678       | 157              | 1168       | 0.180            | 3.678                                    | 1120     | 7942             | 212      | 1468             | 0.1198                               | 0.8294     | 220              | 2270       | 106              | 950                                     | 0.000    | 1.900            |          |                  |                 |            |                  |            |
| 10-Sep-11 | 63           | 1500                           | 12000      | 250              | 1903       | 220                                 | 3898       | 116              | 1284       | 0.220            | 3.898                                    | 910      | 8852             | 235      | 1703             | 0.1328                               | 0.9622     | 280              | 2550       | 114              | 1064                                    | 0.000    | 1.900            |          |                  |                 |            |                  |            |
| 17-Sep-11 | 70           | 1500                           | 13500      | 236              | 2139       | 150                                 | 4048       | 86               | 1370       | 0.150            | 4.048                                    | 1090     | 9942             | 199      | 1902             | 0.1124                               | 1.0746     | 380              | 2930       | 82               | 1146                                    | 0.000    | 1.900            |          |                  |                 |            |                  |            |
| 24-Sep-11 | 77           | 1500                           | 15000      | 226              | 2365       | 40                                  | 4088       | 48               | 1418       | 0.040            | 4.088                                    | 470      | 10412            | 158      | 2060             | 0.0893                               | 1.1639     | 80               | 3010       | 69               | 1215                                    | 0.000    | 1.900            |          |                  |                 |            |                  |            |
| 29-Sep-11 | 82           | 1500                           | 16500      | 230              | 2595       | 50                                  | 4138       | 20               | 1438       | 0.050            | 4.138                                    | 360      | 10772            | 152      | 2212             | 0.0859                               | 1.2498     | 40               | 3050       | 30               | 1245                                    | 0.000    | 1.900            |          |                  |                 |            |                  |            |
| 7-Oct-11  | 90           | 1500                           | 18000      | 211              | 2806       | 30                                  | 4168       | 11               | 1449       | 0.030            | 4.168                                    | 610      | 11382            | 185      | 2397             | 0.1045                               | 1.3543     | 60               | 3110       | 46               | 1291                                    | 0.000    | 1.900            |          |                  |                 |            |                  |            |
| 21-Oct-11 | 104          | 1500                           | 19500      | 250              | 3056       | [40]                                | [4208]     | [10]             | [1459]     | [0.040]          | [4.208]                                  | 1150     | 12532            | 219      | 2616             | 0.1237                               | 1.4780     | 40               | 3150       | 70               | 1361                                    | 0.000    | 1.900            |          |                  |                 |            |                  |            |
| 30-Oct-11 | 113          | 1500                           | 21000      | 250              | 3306       |                                     |            |                  |            |                  |                                          | 1500     | 14032            | 192      | 2808             | 0.1085                               | 1.5865     | 80               | 3230       | 33               | 1394                                    | 0.000    | 1.900            |          |                  |                 |            |                  |            |
| 4-Nov-11  | 118          | 1500                           | 22500      | 219              | 3522       |                                     |            |                  |            |                  |                                          | 1120     | 15152            | 122      | 2930             | 0.0689                               | 1.6554     | 200              | 3430       | 20               | 1414                                    | 0.000    | 1.900            |          |                  |                 |            |                  |            |
| 18-Nov-11 | 132          | 1500                           | 24000      | 240              | 3762       |                                     |            |                  |            |                  |                                          | 1500     | 16652            | 196      | 3126             | 0.1107                               | 1.7661     | [170]            | [3600]     | [34]             | [1448]                                  | [0]      | [1.900]          |          |                  |                 |            |                  |            |
| 26-Nov-11 | 140          | 1330                           | 25330      | 239              | 4001       |                                     |            |                  |            |                  |                                          | 860      | 17512            | 181      | 3307             | 0.1023                               | 1.8684     | [50]             | [3650]     | [10]             | [1458]                                  | [0]      | [1.900]          |          |                  |                 |            |                  |            |
| 3-Dec-11  | 148          | 1500                           | 26830      | 242              | 4243       |                                     |            |                  |            |                  |                                          | 350      | 17862            | 123      | 3430             | 0.0000                               | 1.8684     | [10]             | [3660]     | [10]             | [1468]                                  | [0]      | [1.900]          |          |                  |                 |            |                  |            |
| 17-Dec-11 | 162          | 0                              | 26830      | 0                | 4243       |                                     |            |                  |            |                  |                                          | 290      | 18152            | 0        | 3430             | 0.0000                               | 1.8684     | [0]              | [3660]     | [0]              | [1468]                                  | [0]      | [1.900]          |          |                  |                 |            |                  |            |
| 16-Feb-12 | 223          | 0                              | 26830      | 0                | 4243       |                                     |            |                  |            |                  |                                          | [0]      | [18152]          | [0]      | [3430]           | [0]                                  | [1.8684]   |                  |            |                  |                                         |          |                  |          |                  |                 |            |                  |            |
| 2-Apr-12  | 269          | 0                              | 26830      | 0                | 4243       |                                     |            |                  |            |                  |                                          |          |                  |          |                  |                                      |            |                  |            |                  |                                         |          |                  |          |                  |                 |            |                  |            |

The "bold red" figures denote a state that foods (sugar syrup, pollen paste) with a pesticide (dinotefuran) were fed into a colony and the "Times New Roman" ones denote pesticide-free foods.

The bracketed [ ] figures denote a state that the queen had been lost.

Table 5 Intake of foods (sugar syrup, pollen paste) and pesticide (dinotefuran)

|                                                                                                                                                                                         | This Work: Experiment from 2011 to 2012        |                                                  |                                                           |                                                               |                                                               | Previous Work (Yamada et al., 2012): Experiment in 2010 |                                                                        |                                                                        |                                                                        |                                                |
|-----------------------------------------------------------------------------------------------------------------------------------------------------------------------------------------|------------------------------------------------|--------------------------------------------------|-----------------------------------------------------------|---------------------------------------------------------------|---------------------------------------------------------------|---------------------------------------------------------|------------------------------------------------------------------------|------------------------------------------------------------------------|------------------------------------------------------------------------|------------------------------------------------|
|                                                                                                                                                                                         | Control                                        | DF-Low/Syrup                                     | DF-Low/Pollen                                             | DF-High/Syrup                                                 | DF-High/Pollen                                                | Control                                                 | DF-Low                                                                 | DF-Middle                                                              | DF-High                                                                | Control                                        |
| Vehicle (food) to administer a pesticide                                                                                                                                                |                                                | sugar syrup                                      | pollen paste                                              | sugar syrup                                                   | pollen paste                                                  |                                                         | sugar syrup & pollen paste                                             | sugar syrup & pollen paste                                             | sugar syrup & pollen paste                                             |                                                |
| Concentration in vehicle                                                                                                                                                                | 0 ppm of DF in both sugar syrup & pollen paste | 1 ppm of DF <sup>1)</sup> in sugar syrup         | 0.565 ppm of DF in pollen paste <sup>2)</sup>             | 10 ppm of DF in sugar syrup                                   | 5.65 ppm of DF in pollen paste <sup>3)</sup>                  | 0 ppm of DF in both sugar syrup & pollen paste          | 1 ppm of DF in sugar syrup & 0.333 ppm in pollen paste <sup>3)</sup>   | 2 ppm of DF in sugar syrup & 0.667 ppm in pollen paste <sup>3)</sup>   | 10 ppm of DF in sugar syrup & 3.33 ppm in pollen paste <sup>3)</sup>   | 0 ppm of DF in both sugar syrup & pollen paste |
| Active Ingredient (AI)                                                                                                                                                                  | pesticide-free                                 | Dinotefuran                                      | Dinotefuran                                               | Dinotefuran                                                   | Dinotefuran                                                   | pesticide-free                                          | Dinotefuran                                                            | Dinotefuran                                                            | Dinotefuran                                                            | pesticide-free                                 |
| Pesticide administration (PA)                                                                                                                                                           | No                                             | Continuous<br>from Jul 9 to Oct 21               | Continuous<br>from Jul 9 to Dec 3                         | First one time<br>from Jul 9 to Jul 16                        | First one time<br>from Jul 9 to Aug 6                         | No                                                      | Continuous<br>from Jul 18 to Oct 10                                    | Continuous<br>from Jul 18 to Sep 17                                    | First one time<br>from Jul 18 to Jul 30                                | No                                             |
| Total intake of pesticide (dinotefuran) through sugar syrup in a colony (DF-TISS) or that through pollen paste (DF-TIPP) ; [mg]                                                         | 0.0000                                         | 4.208 from syrup                                 | 1.8692 from pollen                                        | 1.9 from syrup                                                | 0.5257 from pollen                                            | 0.0000                                                  | 9.5 from syrup<br>0.47 from pollen                                     | 9.98 from syrup<br>0.54 from pollen                                    | 6.33 from syrup<br>0.5 from pollen                                     | 0.0000                                         |
| <b>CASE 1 : Duration between the start of pesticide administration (PA) and the stop for an experimental colony or that of food feeding (FF) for a control colony</b>                   |                                                |                                                  |                                                           |                                                               |                                                               |                                                         |                                                                        |                                                                        |                                                                        |                                                |
| Grand total number of honeybees in a colony (GTNH) during a period of PA for an experimental colony or that of FF for a control colony                                                  | 73074<br>from Jul 9 to Dec 17 in 2011          | 13543<br>from Jul 9 to Oct 21 in 2011            | 30779<br>from Jul 9 to Dec 3 in 2011                      | 6544<br>from Jul 9 to Jul 16 in 2011                          | 8078<br>from Jul 9 to Jul 16 in 2011                          | 46260<br>from Jul 18 to Nov 21 in 2010                  | 28500<br>from Jul 18 to Oct 10 in 2010                                 | 33931<br>from Jul 18 to Sep 17 in 2010                                 | 32277<br>from Jul 18 to Jul 30 in 2010                                 | 52212<br>from Jul 18 to Nov 21 in 2010         |
| Total intake of pesticide (dinotefuran) per bee during a period of PA for an experimental colony [AI ng/bee] <sup>5)</sup> ; DF-TISS/GTNH or DF-TIPP/GTNH                               | 0<br>from Jul 9 to Dec 17 in 2011              | 310.7 thru syrup<br>from Jul 9 to Oct 21 in 2011 | 60.73 thru pollen<br>from Jul 9 to Dec 3 in 2011          | 290.3 thru syrup<br>from Jul 9 to Jul 16 in 2011              | 65.08 thru pollen<br>from Jul 9 to Jul 16 in 2011             | 0<br>from Jul 18 to Nov 21 in 2010                      | 333.3 thru syrup<br>16.49 thru pollen<br>from Jul 18 to Oct 10 in 2010 | 294.1 thru syrup<br>15.91 thru pollen<br>from Jul 18 to Sep 17 in 2010 | 196.1 thru syrup<br>15.49 thru pollen<br>from Jul 18 to Jul 30 in 2010 | 0<br>from Jul 18 to Nov 21 in 2010             |
| Total intake of sugar syrup in a colony (TISS) during a period of PA for an experimental colony or that of FF for a control colony [g]                                                  | 26830<br>(pesticide-free)                      | 4208<br>(1 ppm of DF)                            | 18152<br>(pesticide-free)                                 | 190<br>(10 ppm of DF)                                         | 90<br>(pesticide-free)                                        | 9500<br>(pesticide-free)                                | 9500<br>(1 ppm of DF)                                                  | 4987.5<br>(2 ppm of DF)                                                | 633.33<br>(10 ppm of DF)                                               | 9500<br>(pesticide-free)                       |
| Total intake of pollen paste in a colony (TIPP) during a period of PA for an experimental colony or that of FF for a control colony [g]                                                 | 4243<br>(pesticide-free)                       | 1459<br>(pesticide-free)                         | 3430<br>(0.565 ppm of DF)                                 | 161<br>(pesticide-free)                                       | 93<br>(5.65 ppm of DF)                                        | 1500<br>(pesticide-free)                                | 1410<br>(0.3333 ppm of DF)                                             | 810<br>(0.667 ppm of DF)                                               | 150<br>(3.333 ppm of DF)                                               | 1500<br>(pesticide-free)                       |
| TISS per bee during a period of PA for an experimental colony or that of FF for a control colony [g/bee] ; TISS/GTNH                                                                    | 0.367                                          | 0.311                                            | 0.590                                                     | 0.029                                                         | 0.011                                                         | 0.205                                                   | 0.333                                                                  | 0.147                                                                  | 0.020                                                                  | 0.182                                          |
| TIPP per bee during a period of PA for an experimental colony or that of FF for a control colony [g/bee] ; TIPP/GTNH                                                                    | 0.058                                          | 0.108                                            | 0.111                                                     | 0.025                                                         | 0.012                                                         | 0.032                                                   | 0.049                                                                  | 0.024                                                                  | 0.005                                                                  | 0.029                                          |
| <b>CASE 2 : Duration between the start of pesticide administration (PA) and the colony extinction (CE) for an experimental colony or that of food feeding (FF) for a control colony</b> |                                                |                                                  |                                                           |                                                               |                                                               |                                                         |                                                                        |                                                                        |                                                                        |                                                |
| GTNH till CE for a experimental colony or during FF for a control colony <sup>4)</sup>                                                                                                  | 73074<br>from Jul 9 to Dec 17 in 2011          | 13543<br>from Jul 9 to Oct 21 in 2011            | 31076<br>from Jul 9 in 2011 to Feb 16 in 2012             | 13457<br>from Jul 9 to Dec 17 in 2011                         | 8582<br>from Jul 9 to Aug 6 in 2011                           | 46260<br>from Jul 18 to Nov 21 in 2010                  | 28500<br>from Jul 18 to Oct 10 in 2010                                 | 33931<br>from Jul 18 to Sep 17 in 2010                                 | 34642<br>from Jul 18 to Oct 30 in 2010                                 | 52212<br>from Jul 18 to Nov 21 in 2010         |
| Total intake of pesticide (dinotefuran) per bee till CE for an experimental colony [AI ng/bee] <sup>5)</sup> ; DF-TISS/GTNH or DF-TIPP/GTNH                                             | 0<br>from Jul 9 to Dec 17 in 2011              | 310.7 thru syrup<br>from Jul 9 to Oct 21 in 2011 | 60.15 thru pollen<br>from Jul 9 in 2011 to Feb 16 in 2012 | 141.2 thru syrup<br>from Jul 9 to Dec 17 in 2011              | 61.26 thru pollen<br>from Jul 9 to Aug 6 in 2011              | 0<br>from Jul 18 to Nov 21 in 2010                      | 333.3 from syrup<br>16.49 from pollen<br>from Jul 18 to Oct 10 in 2010 | 294.1 thru syrup<br>15.91 thru pollen<br>from Jul 18 to Sep 17 in 2010 | 182.7 thru syrup<br>14.43 thru pollen<br>from Jul 18 to Oct 30 in 2010 | 0<br>from Jul 18 to Nov 21 in 2010             |
| Total intake of sugar syrup in a colony (TISS) during a period of PA for an experimental colony or that of FF for a control colony [g]                                                  | 26830<br>(pesticide-free)                      | 4208<br>(1 ppm of DF)                            | 18152<br>(pesticide-free)                                 | 3660<br>(190g with DF of 10 ppm & the rest without pesticide) | 1130<br>(pesticide-free)                                      | 9500<br>(pesticide-free)                                | 9500<br>(1 ppm of DF)                                                  | 4987.5<br>(2 ppm of DF)                                                | 4750<br>(633.33g with DF of 10 ppm & the rest without pesticide)       | 9500<br>(pesticide-free)                       |
| Total intake of pollen paste in a colony (TIPP) till CE for a experimental colony or during FF for a control colony [g]                                                                 | 4243<br>(pesticide-free)                       | 1459<br>(pesticide-free)                         | 3430<br>(0.565 ppm of DF)                                 | 1468<br>(pesticide-free)                                      | 233<br>(93g with DF of 5.65 ppm & the rest without pesticide) | 1500<br>(pesticide-free)                                | 1410<br>(0.3333 ppm of DF)                                             | 810<br>(0.6667 ppm of DF)                                              | 1000<br>(150g of DF of 3.333 ppm & the rest without pesticide)         | 1500<br>(pesticide-free)                       |
| TISS per bee till CE for a experimental colony or during FF for a control colony [g/bee] ; TISS/GTNH                                                                                    | 0.367                                          | 0.311                                            | 0.584                                                     | 0.272                                                         | 0.132                                                         | 0.205                                                   | 0.333                                                                  | 0.147                                                                  | 0.137                                                                  | 0.182                                          |
| TIPP per bee till CE for a experimental colony or during FF for a control colony [g/bee] ; TIPP/GTNH                                                                                    | 0.058                                          | 0.108                                            | 0.110                                                     | 0.109                                                         | 0.027                                                         | 0.032                                                   | 0.049                                                                  | 0.024                                                                  | 0.029                                                                  | 0.029                                          |

1) Dinotefuran as an active ingredient (A.I.)

2) Pollen paste was made of 15 parts of sugar syrup with dinotefuran and 10 parts of pollen without pesticide (dinotefuran) in weight: E.g., as pollen paste in DF-Low/Pollen is composed of 13 parts of sugar syrup with 1 ppm dinotefuran and 10 parts of pollen without dinotefuran, the concentration of dinotefuran in pollen paste becomes  $1 \text{ [ppm]} \times 13/23 \approx 0.565 \text{ [ppm]}$

3) Pollen paste was made of 1 part of sugar syrup with pesticide (dinotefuran) and 2 parts of pollen without pesticide in weight: E.g., as pollen paste in DF-Low is composed of 1 part of sugar syrup with 1 ppm dinotefuran and 2 parts of pollen without dinotefuran, the concentration of dinotefuran in pollen paste becomes  $1 \text{ [ppm]} \times 1/3 \approx 0.333 \text{ [ppm]}$ .

4) Estimated from the sum of the number of initial adult bees and that of newly-born adult bees by eclosion of capped brood.

5) Obtained by dividing the total intake of pesticide (dinotefuran) during feeding toxic food (DF-TISS or DF-TIPP) by the grand total number of honeybees (GTNH): E.g., for DF-Low/Pollen the total intake of pesticide (DF-TIPP) per bee from July 9 to December 3 is given by  $1.8692 \text{ [mg]} / 30779 \approx 60.73 \text{ [ng]/bee}$  in the case of CASE 1, and is similarly given by
